# Supplementary material for: Complementing XCO 2 imagery with ground-based CO 2 and 14 CO 2 measurements to monitor CO 2 emissions from fossil fuels on a regional to local scale
Source: Copernicus journal article supplement (doi:10.5194/amt-2022-48), 2022-03-15
Supplement: Supplementary file [file amt-2022-48-AC1-supplement.pdf]

**We thank both reviewers for their assessment of our manuscript. We provide detailed answers to their comments below in blue font. A version of the revised manuscript with a tracking of the changes applied accordingly will be joined to the new submission.**

## RC1

In "Complementing XCO<sub>2</sub> imagery with ground-based CO<sub>2</sub> and 14CO<sub>2</sub> measurements to monitor CO<sub>2</sub> emissions from fossil fuels on a regional to local scale", Potier et al. investigate different approaches to estimating gridded fossil fuel emissions from different types of in situ and satellite observational data. These tests are often referred to as Observing System Simulation Experiments (OSSEs), although even the terminology is a subject of debate.

Strictly speaking, we simulate the impact of an observing system through data assimilation experiments. Furthermore, we use our experiments to assess the design of new observing systems. The label "OSSE" seems to be well appropriate.

The contents of the paper are clearly relevant to the 2015 Paris Climate Accord, the observational and modeling capabilities needed to support it, and the subject matter and scope of Atmospheric Measurement Techniques. OSSEs are often criticized for their lack of representativeness of real data.

This comment refers to the fact that specific sources of uncertainties can be ignored in OSSEs, and that the characterization of the sources of errors that are accounted for is often difficult. Indeed, the aims and analysis of the OSSEs must be consistent with the range of sources of errors that are accounted for. We discussed the results with respect to this and we will add further clarifications on this topic in the new version of the manuscript.

In particular, following this review, we will complement the list of major sources of errors not accounted for in the experiments and discussed in section 4 to include the part of the errors in the actual data that bear spatial correlations (often referred to as "biases" or "systematic errors"). We will also better discuss the topic of the uncertainties in the boundary conditions.

For example, this manuscript assumes all biases and spatial correlations are zero, while observational and transport biases (Schuh, Peiro, etc.) are arguably the greatest barrier to improvements in both surface flux estimates and the science they can enable.

Regarding this specific point, see our general answer above and our answer to the corresponding "major comment" below.

Nevertheless, the goals of the Paris agreement are rapidly approaching, and systems must develop even more rapidly to meet those needs. This paper is a necessary first step in that direction that could be strengthened in several ways.

Major issues:

---

1) Woodbury matrix identity: Equation 1 and Lines 522-524. This is an unfortunate oversight that has persisted in the geosciences literature despite being a basic result from linear algebra.

The application of the Woodbury matrix identity leads to the second traditional formulation of the A matrix based on the inversion of non-diagonal matrices in the observation space i.e.  $A = (I - KH)B$  where  $K = BH^T (HBH^T + R)^{-1}$ , which is well known in the geosciences literature.

Equation 1 in the paper is the formulation of A based on inversion of non-diagonal matrices in the control space.

In our group we have used one or the other formulation depending on the dimensions of the problem (see, e.g., <https://doi.org/10.1029/1999JD900342> and <https://doi.org/10.5194/acp-10-3107-2010>). In our new study, when considering satellite observations, our control space has a smaller dimension than the observation space and the most appropriate of the two equations is thus the one we use.

If you "push the inverse through", you get the more appropriate equation  $A = B + HRH^T$ , which not only is simpler, but you can compute!

The reviewer's equation is wrong. Beside contradicting the fundamental equations of data assimilation (that are less simple to compute), it would imply that the posterior uncertainty is larger than the prior uncertainty.

This is a fundamental result from data assimilation and is a little unnerving to see in a paper about data assimilation. It also makes the statement on Lines 522-524 false, which is a good thing, because you can in fact estimate uncertainties in much higher dimensions than considered in this paper.

Given our previous answer, we disagree.

2) Assumptions about uncertainties: Line 114, Section 2.4.2 and 4.1. The assumptions of zero bias and zero spatial correlation in the experiments are unrealistic, but perhaps necessary to do any meaningful analysis.

a) We deliberately excluded some sources of observation errors or some components of the observation errors in these experiments because they can hardly be characterized appropriately, in particular when they result from numerical models (atmospheric radiative transfer, transport or emission models). They consist in unknown time-evolving residuals, for which existing studies hardly provide more than qualitative insights, or case-specific values. Further, they tend to diminish along with model and measurement progress, in contrast to random errors.

b) The discussion (see section 4.1) addressed the impact of more realistic error patterns associated to transport errors and to prior uncertainties in the emission estimates. The discussion on the so-called "bias" or "systematic errors" in the data (corresponding to errors with spatial correlations) was skipped: these spatially correlated observation errors had been discussed in detail in the Santaren et al. 2021 AMT publication. We acknowledge the need for mentioning it and referring to the discussion led in this previous publication, and we will do it in the new version of the manuscript.

Almost any assumptions made about uncertainties could be criticized, so it's hard to pinpoint exactly what matters and what doesn't. Maybe that's the whole point.

We think that regarding the spatially correlated transport or observation errors, we can hardly attempt to do more than the type of qualitative assessments made Section 4 (see our previous answer).

I do think you could make an argument that retrieval and transport biases (Crowell, Peiro, Schuh refs below), combined with our lack of understanding of appropriate spatiotemporal correlations (my own speculation) are the major roadblocks for further development in the field,

We will add some text regarding this, but this consideration is nearly out of the scope of this study, which we will also try to clarify. This study is focused on the limitation of the observation networks, not on that of the current modeling frameworks used to process the measurements. We did include random transport errors associated to the observations to account, to some extent, for the respective weight of these errors on in situ and satellite data, but we restrained ourselves from digging into this component further.

which leads me to have some serious reservations about the claims in Section 4.1 and to wonder if they're even supported by the paper's analysis.

We do not understand this point about section 4.1, which actually attempts at assessing the potential impact of the complex error patterns arising from the current model limitations.

Fortunately, I think almost all of this argument is tangential to the goals and actual results of the paper.

We also think that this is the case. We will add some text to better highlight it in the new version of the manuscript.

Section 4.2 alone is enough to motivate the work. All OSSEs are flawed, but they will be needed to develop our monitoring capabilities as done here.

Yes, this is the general answer we would also provide to this series of comments.

3) Plumes? I was expecting to see a figure of the things you're actually observing here: XCO<sub>2</sub>, in situ surface CO<sub>2</sub> and 14CO<sub>2</sub>, perhaps even showing a plume? It would be nice to see those from the model and data somewhere. Maybe right after Figure 1?

We agree with this comment. We will add 3 figures of the signal in the XCO<sub>2</sub>, surface CO<sub>2</sub> and 14CO<sub>2</sub> fields at noon from the anthropogenic and biogenic fluxes in the domain.

4) Data availability. This paper lacks a data availability section that I thought AMT required. Hopefully this was an oversight, but I cannot see how it would be appropriate to publish this paper without clear links to the surface flux priors, simulated XCO<sub>2</sub> retrievals, and other input data used in this study.

The manuscript properly describes with references the products from other groups that were used as inputs for the experiments (mainly for the surface fluxes and the simulation of the satellite sampling).

A "code and data availability" section will provide the links to the CIF platform (including its connection to the CHIMERE model).

5) Linearity assumption: Line 144. I do not understand this. Are you using a linear transport operator or are you just using the linearization to compute uncertainties? The latter is common, while I have a hard time understanding how the former would be justified, especially during the day in the Summer. Can you please explain/clarify?

The CHIMERE transport model bears non-linearities but these non-linearities are modest since, at the timescales considered in this study, CO<sub>2</sub> on the one hand, 14CO<sub>2</sub> on the other hand are transported as passive atmospheric tracers (the non-linearities in CHIMERE arise from the approximation of the transport equations over a discretized grid).

We build a linear matrix operator  $H_{\text{transp}}$  based on the simulation of the signal from each control parameter using the CHIMERE transport model i.e. using finite differences (and not the tangent linear code for CHIMERE). We rely on the fact that the non-linearities of CHIMERE are small, not on the linearization of CHIMERE.

This sentence will be updated to clarify this point.

Since this comment focuses on the atmospheric transport, we do not understand the point about Summer.

Minor issues:

---

Our COVID-19 paper (<https://doi.org/10.1126/sciadv.abf9415>) seems relevant to this work. It would be nice to address that in this paper, but not necessary.

We do not really see how this reference could fit in our manuscript. We acknowledge that the first version of the manuscript lacked of reference to publications on the monitoring of CO<sub>2</sub> emissions based on 14CO<sub>2</sub> data and the crossing of satellite and surface data. We will add references to past publications considering the asset of 14CO<sub>2</sub> surface networks and discussing the complementarity of satellite and surface networks, but we think that a reference to the above-mentioned publication would fall out of the scope of our study.

Bulky notation: Coming from a math background I find multi-character sub and superscripts unnerving, but realize it is more common in the geosciences literature. Still, I think many of the equations could be clarified by removing the excessively verbose sub/super-scripting. For example:  $H_s, H_t$ , and  $H_d$  instead of  $H_{\{\text{sample}\}}, H_{\{\text{transp}\}}, H_{\{\text{distr}\}}$ ; C, CO<sub>2</sub>, or [CO<sub>2</sub>] instead of  $C_{\{a, \text{CO}_2\}}$ ,  $F^{14}_N$  instead of  $F^{14}_{\{\text{Nucl}\}}$ , etc. This would be particularly helpful in Equation 9 that has something like 33 characters in subscripts and 7 on the baseline, making it particularly difficult to parse.

Classical publications in the field of data assimilation or inverse problems have made use of such multi-character sub/sup scripts when facing problems with complex references to methods or objects (e.g. Tarantola 2005) even if we agree that publications in mathematics tend to avoid it. Since there is no strict rule regarding such a usage, and since it highly supports the readability of publications with practical objects (models, operations, sources etc.) we prefer to maintain most of the current notations. In particular, considering the examples listed by the reviewer above: we assume that using  $H_s, H_t$  and  $H_d$  instead of  $H_{\{\text{sample}\}}, H_{\{\text{transp}\}}$  and  $H_{\{\text{distr}\}}$  and would force many readers to regularly check the notations earlier in the text to follow it.

However, we will simplify the notations, removing CO<sub>2</sub> and 14C sub/sup scripts in some terms of equations 3 and 4 when the components to which they apply systematically correspond to CO<sub>2</sub> and 14C respectively.

Line 138. Who is "they"?

"They" corresponds to "the domain and the horizontal grid". We have now changed "they cover" into "the domain covers"

Line 141. 300 hPa seems very low. The paper cites the results of Santaren et al. (2021) as saying that uncertainty in boundary conditions have a negligible impact. It might be helpful to still say where those boundary conditions came from (maybe I missed this)

In this study, the only components which need to enter into the transport simulation are those which bear uncertainties whose impact is accounted for (Equation 1 propagates uncertainties through the atmospheric transport) or those which

interfere with the transport of the components which bear uncertainties. By assuming that the impact of the uncertainties in the boundary conditions is negligible, and by considering that due to the linearity of the atmospheric transport, the boundary conditions do not interfere with the transport of signal from the surface flux fields, we cancel the terms associated to the boundary conditions in our equations. Therefore, we do not need any product to simulate the boundary conditions.

We will slightly expand the corresponding explanation in the new version of the manuscript.

and why Santaren et al. concluded that their influence did not have a strong impact on the inferred fluxes.

For each assimilation window, Santaren et al. 2021 controlled the boundary conditions and their results demonstrated a good skill of the inversion to separate the uncertainties in these boundary conditions from that in the fluxes within the modelling domain and the assimilation window. However, they summarized the uncertainties in these boundary conditions as the uncertainty in a single scaling factors for these conditions.

We thus agree that we need to expand the explanations and discussions regarding the boundary conditions (in sections 2.3.3 and 4.1), indicating that:

- The very large scale uncertainties in the initial and lateral boundary conditions should not have a large impact on the results according to the results from Santaren et al. 2021

- fine scale uncertainties in the initial and lateral boundary conditions are difficult to account for here and should be quite unlikely since the lag-time between the initial conditions and the first observations is of 10h and since the model boundaries are quite far from the area of interest.

Line 188. I'm assuming the daily partition coefficients are used just to apply a diurnal cycle, but I'm not sure. Could you be more explicit?

These coefficients are used to separate heterotrophic respiration from the autotrophic one, when the sum of the 2 (total respiration) is provided with VPRM. We need this separation because these two components of the total respiration from the ecosystems do not have the same isotopic fractionation. Diurnal cycle is already accounted for in the hourly fields from the VPRM simulations.

We will add some words to clarify this point.

Line 199. "contains" I think this is maybe a typo.

Correction will be done into "content"

Signs. Are the signs of the delta values and Equations 3 and 4 consistent? I think if you're using NPP instead of NPE a positive sign would imply a flux from the atmosphere to the land, but that would make the signs in Equation 3 incorrect. Can you please address this.

We used NPP from the atmosphere point of view, a positive sign implying a flux from the surface to the atmosphere. We agree that we should have used the NBE to describe such a flux and it will be corrected.

Section 4.1. I find much of this highly speculative and unrelated to the results in the paper.

We are surprised by this comment which seems to be at odds with the major comments from the reviewer implicitly asking for more discussions on 1) the errors or error components that are not accounted for in the experiments 2) what can be said with our OSSEs given their configuration.

Line 511: "...". Is this a typo?

Correction will be done: ... => .

Lines 540-541: "it hardly provides information on plants, cities and regions outside its FOV". Again, I find this speculative and not necessarily shown in the paper, or necessary. CO2 data can potentially have an impact on fluxes upwind of its observation. Please either support or remove.

Again, we are surprised by this comment since these initial lines of section 4.2 follow strongly the reading of our results and figures (e.g. figure 7).

Line 548: "precision". And accuracy too?

As detailed in the discussion above (it will be better explained in the manuscript), the "biases" in observation error are not accounted for: the study focuses on the random instrument error (precision).

Lines 560-567: This seems to be the strongest part of the paper, but I'm not sure the abstract gives the same impression.

The lines 22-24 correspond to the lines 560-563. We will add the statement 566-567 to the abstract.

Line 569: "Tn". Definitely a typo.

Yes, the correction will be done

## RC2

This paper quantifies the uncertainty reduction in fossil fuel emission estimates caused by different combinations of XCO<sub>2</sub> satellite data, CO<sub>2</sub> surface observations and <sup>14</sup>CO<sub>2</sub> observations. The study uses 1 day model simulations that map the CO<sub>2</sub> emissions from different regions and emission categories on the expected signal in the measurement network.

The paper has a clear focus, and presents the results in a clear and concise way.

We thank the reviewer for this general statement.

However, the paper is somewhat limited in scope: only one day in 2015, biases are not addressed, and no actual observations are simulated.

The rationale for conducting the experiments over a single day is given and discussed in section 4.1. Regarding the use of actual observations: the lack of spaceborne XCO<sub>2</sub> imagery and of <sup>14</sup>CO<sub>2</sub> networks covering local to regional scale fluxes such as the ones analyzed here prevent for considering it. The purpose of this study is to investigate the potential of such datasets. We will add few statements in the introduction to clarify this last point.

There are a number of issues (listed below) that need to be addressed before the paper can be published in its final form.

I furthermore attach an annotated pdf in which minor (and some major) issues are addressed.

### Model errors

I find the treatment of model errors particularly simplified (line 312: *Here we assume that the uncertainty in the observation operator is dominated by that of the transport model and we ignore temporal and spatial auto-correlations in these uncertainties*). Given the large role of errors in this paper, I would expect at least an analysis how the uncertainty reduction depends on the (sometimes) arbitrary choices of model error.

See our response to the first reviewer on this point. Despite some disagreement on Reviewer 1's demonstration, as explained above, we agree on his synthesis conclusion "All OSSEs are flawed, but they will be needed to develop our monitoring capabilities as done here". We will add some text about the limitations of the atmospheric inversion approach due to retrieval and model errors, but they will nearly be out of the scope of our study, focused on the limitation of the observation networks, not on that of the current modeling frameworks used to process the measurements. We will also try to clarify this.

### Satellite track

A CO<sub>2</sub>M track is used to investigate the sensitivity of XCO<sub>2</sub> data to CO<sub>2</sub> emissions. However, the track is from 2014 (including the cloudiness etc.), which differs from the simulated year 2015. This might potentially introduce biases and the authors should at least argue why they focus on 2015 while the track is simulated for 2014.

We do not think that it is a significant issue. The major inconsistency raised by such a difference is between the cloud patterns and the meteorological forcing of the atmospheric transport. However, the cloud cover in the satellite track we selected is moderate, the gaps due to this cover are spread relatively homogeneously along the track, and a redistribution of these gaps with similar fraction of cloudy scenes should not impact the general results. We think that the potential

inconsistency between the variations in space of the XCO<sub>2</sub> errors (which are limited, in the range 0.4 to 0.7 ppm) with these meteorological conditions is negligible.

We will add some statements regarding the cloud cover in section 4.1.

### **Self-referencing**

There is annoying self-referencing, while important work of other groups is not mentioned. For instance, the important paper by Basu et al. 2020 (PNAS) is missing, which is a severe oversight by the author team, and actually quite worrying. Instead, there is substantial self-referencing. I understand that this work builds on many existing activities in the group. However, it is a good tradition to give an overview of activities performed by other groups (e.g. in the introduction).

We fully agree with this general comment and apologize for this lack of attention on our side. This point was overlooked when submitting the initial version of the manuscript. We will propose a more extensive list of publications especially on 14CO<sub>2</sub> networks, and on the combination of surface and satellite data.

Now, the introduction is used to already present a misplaced introduction of their own system (lines 60-65), which clearly belongs in the method section.

Indeed, part of the info given here better fits in section 2 and we will move it there. However, some of the general characteristics of the system should be presented in the introduction since they provide a general view of the types of analysis that will be detailed in the manuscript.

We provide a joint document with the text annotated: it contains the detailed comments sent by the reviewer followed by our corresponding responses.

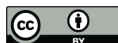

# Complementing XCO<sub>2</sub> imagery with ground-based CO<sub>2</sub> and <sup>14</sup>CO<sub>2</sub> measurements to monitor CO<sub>2</sub> emissions from fossil fuels on a regional to local scale

Elise Potier<sup>1</sup>, Grégoire Broquet<sup>1</sup>, Yilong Wang<sup>1,2</sup>, Diego Santaren<sup>1</sup>, Antoine Berchet<sup>1</sup>, Isabelle Pison<sup>1</sup>, Julia Marshall<sup>3</sup>, Philippe Ciais<sup>1</sup>, François-Marie Bréon<sup>1</sup>, and Frédéric Chevallier<sup>1</sup>

<sup>1</sup>Laboratoire des Sciences du Climat et de l'Environnement, LSCE/IPSL, CEA-CNRS-UVSQ, Université Paris-Saclay, F-91191 Gif-sur-Yvette, France

<sup>2</sup>Key Laboratory of Land Surface Pattern and Simulation, Institute of Geographical Sciences and Natural Resources Research, Chinese Academy of Sciences, Beijing, China.

<sup>3</sup>Max Planck Institute for Biogeochemistry (MPI-BGC), Jena, Germany. Now at Deutsches Zentrum für Luft- und Raumfahrt (DLR), Institut für Physik der Atmosphäre, Oberpfaffenhofen, Germany

**Correspondence:** Elise Potier (elise.potier@lscce.ipsl.fr)

**Abstract.** Various satellite imagers of the vertically integrated column of carbon dioxide (XCO<sub>2</sub>) are under development to enhance the capabilities for the monitoring of the fossil fuel (FF) CO<sub>2</sub> emissions. XCO<sub>2</sub> images can be used to detect plumes from cities and large industrial plants, and to quantify the corresponding emissions using atmospheric inversions techniques. However, this potential and the ability to catch the signal from more diffuse FF CO<sub>2</sub> sources can be hampered by the mix  
5 between these FF signals and a background signal from other types of CO<sub>2</sub> surface fluxes, and in particular of biogenic CO<sub>2</sub> fluxes. The deployment of dense ground-based air-sampling networks for CO<sub>2</sub> and radiocarbon (<sup>14</sup>CO<sub>2</sub>) could complement the spaceborne imagery by supporting the separation between the fossil fuel and biogenic or biofuel (BF) CO<sub>2</sub> signals. We evaluate this potential complementarity with a high resolution analytical inversion system focused on Northern France, Western Germany, Belgium, Luxembourg and a part of the Netherlands, and with pseudo-data experiments. The inversion system  
10 controls the FF and BF emissions from the large urban areas and plants, in addition to regional budgets of more diffuse emissions or of biogenic fluxes (NEE, Net Ecosystem Exchange), at an hourly scale over a whole day. The system assimilates pseudo data from a single track of a 300-km swath XCO<sub>2</sub> imager at 2 km resolution and from surface ground-based CO<sub>2</sub> and/or <sup>14</sup>CO<sub>2</sub> networks. It represents the diversity of <sup>14</sup>CO<sub>2</sub> sources and sinks and not just the dilution of radiocarbon-free FF CO<sub>2</sub> emissions. The uncertainty in the resulting FF CO<sub>2</sub> emissions at local (urban area/ plant) to regional scales is directly derived  
15 and used to assess the potential of the different combinations of observation systems. The assimilation of satellite observations yield estimates of the morning regional emissions with an uncertainty down to 10% (1 sigma) in the satellite field of view, from an assumed uncertainty of 15% in the prior estimates. However, it does not provide direct information about emissions outside the satellite field of view and neither about afternoon or nighttime emissions. The co-assimilation of <sup>14</sup>CO<sub>2</sub> and CO<sub>2</sub> data lead to a further reduction of the uncertainty in the estimates of FF emissions. However, this further reduction is significant  
20 only in administrative regions with three or more <sup>14</sup>CO<sub>2</sub> and CO<sub>2</sub> sampling sites. The uncertainty in the estimates of 1-day emission in North Rhine-Westphalia, a region with three sampling sites, decreases from 8 to 6.6% when assimilating the in





situ  $^{14}\text{CO}_2$  and  $\text{CO}_2$  data in addition to the satellite data. Furthermore, this ~~new~~ decrease appears to be larger when the ground stations are close to large FF emission areas, providing an additional direct constraint for the estimate of these sources rather than supporting the characterization of the background signal from the NEE and its separation from that of the FF emissions.

## 25 1 Introduction

Article 4 of the Paris Climate Agreement aims to reduce greenhouse gas (GHG) emissions within a few decades on the basis of equity, until they are compensated by GHG removals. The monitoring of this international ambition implies some operational observation of the GHG emissions, in particular those of carbon dioxide ( $\text{CO}_2$ ) from fossil fuels (FFs). A significant contribution to this monitoring is expected from observations of atmospheric composition and atmospheric inversion systems (IPCC, 2019; Ciais et al., 2015; Pinty et al., 2017). In particular, the development of spaceborne imagery of the vertically integrated column of  $\text{CO}_2$  ( $\text{XCO}_2$ ), at spatial resolution better than 5 km, should make it possible to detect plumes ~~under the~~ ~~wind~~ from anthropogenic sources of  $\text{CO}_2$  (Pillai et al., 2016; Schwandner et al., 2017; Broquet et al., 2018). A key example of such imagery is the Copernicus Anthropogenic Carbon Dioxide Monitoring ( $\text{CO}_2\text{M}$ ; Pinty et al., 2017) constellation which is scheduled to launch in 2025-2026. Each satellite of the constellation will observe  $\text{XCO}_2$  with a  $\sim 300$  km swath and a  $\sim 2 \times 2$  km<sup>2</sup> spatial resolution.

Previous analyses of the potential of high resolution satellite imagery (such as ESA, 2015; Broquet et al., 2018; Santaren et al., 2021; Wang et al., 2020; Kuhlmann et al., 2019) have focused on its use as a stand-alone observation system. However, the distinction between FF and natural  $\text{CO}_2$  signals and thus the separation between the FF and natural components in the flux estimates remain difficult, even when using high-resolution images (Santaren et al., 2021). The separation between the emissions from biofuel (BF) and FF combustion is another challenge because BF emissions can be located in the same hot-spots as FF ones (Ciais et al., 2020).

The deployment of dense ground-based networks of near-surface air sampling for radiocarbon ( $^{14}\text{CO}_2$ ) has been considered in complement to the spaceborne imagery (Ciais et al., 2015). Indeed FF-emitted  $\text{CO}_2$  is radiocarbon-free (Pinty et al., 2017; Wang et al., 2018; Levin et al., 2003; Wang, 2016; Basu et al., 2016):  $^{14}\text{CO}_2$  surface data have a less ambiguous sensitivity to the signal from FF emissions than  $\text{CO}_2$  surface data. However, practical constraints lead to sampling  $^{14}\text{CO}_2$  daily if not weekly to monthly. This prevents the direct identification of temporal variations at higher frequencies, e.g. hourly, associated with the signal from cities and point sources, but time series of continuous hourly measurements of  $\text{CO}_2$  should enable these specific temporal variations to be captured.

This study aims at assessing the potential of combination between a spaceborne  $\text{XCO}_2$  imager and ground based  $^{14}\text{CO}_2$  and  $\text{CO}_2$  networks to monitor FF emissions of  $\text{CO}_2$ . More specifically, it aims at assessing how these additional ground-based networks decrease the uncertainty in FF emissions by improving the distinction between the FF and biogenic fluxes. The inversion tests performed in this study with different sets of pseudo-data correspond to Observing System Simulation Experiments (OSSEs). They include the simulation of the sampling of a  $\text{CO}_2\text{M}$ -like spaceborne instrument from single orbits over Western Europe at 12:00 (Universal Time Coordinated, UTC).





55 The work performed relies on a Bayesian inversion framework, in which the knowledge of control parameters, here the CO<sub>2</sub> fluxes, improves with the assimilation of related observations. It is focused on the direct computation of the uncertainty in the control parameters. We analyse the uncertainty in the *posterior* values of the control parameters as a function of the observation system that is used for the inversion, and the corresponding uncertainty reduction, i.e., the relative difference between the posterior uncertainty and the prior uncertainty in the control parameters.

60 The analysis of this uncertainty reduction is made at the local scale (urban areas, industrial plants) to the regional scale, following the rationale and the general inverse modelling framework of Santaren et al. (2021). It focuses on a large part of Western Europe, using a configuration of the CHIMERE regional transport model (Menut et al., 2013) with a 2 km horizontal zoom over Northern France, Western Germany, Belgium, Luxembourg and a large part of the Netherlands. It controls FF emissions from urban areas and industrial plants in addition to regional budgets of more diffuse emissions or of biogenic fluxes at an hourly scale. The analytical expression of the inversion framework (Wu et al., 2016) allows for the results of the individual control parameters or for budgets integrated in space within the regions or in time within a day to be analyzed and for many options for the observation system to be tested despite the dimension of the high resolution inversion problem.

65 The assimilation of <sup>14</sup>CO<sub>2</sub> and CO<sub>2</sub> surface data in addition to XCO<sub>2</sub> images and the inclusion of non-FF fluxes of <sup>14</sup>CO<sub>2</sub> in the inversion framework make use of the larger-scale inversion framework developed by Wang (2016). It takes into account not only the <sup>14</sup>CO<sub>2</sub> emissions from nuclear power plants and fuel reprocessing plants, but also the specific isotopic signatures of the heterotrophic respiration (HR) and Net Primary Production (NPP) by land ecosystems and thus solves for these fluxes separately. It also controls the emissions from BF burning.

70 The analytical inversion framework is described in section 2. Results from the pseudo-data experiments with the assimilation of satellite observations alone are taken as a reference and presented in Section 3.1. Then a larger suite of experiments combining <sup>14</sup>CO<sub>2</sub> and CO<sub>2</sub> surface and XCO<sub>2</sub> satellite observations is used to assess their complementarity in Sections 3.2 to 3.3. Section 4 provides some discussions about this inversion framework and a conclusion regarding complementarity of XCO<sub>2</sub> satellite, <sup>14</sup>CO<sub>2</sub> and CO<sub>2</sub> surface observations.

## 2 Methodology of the inversion

75 This section presents the high dimensional inversion framework designed in this study for the co-assimilation of CO<sub>2</sub> and <sup>14</sup>CO<sub>2</sub> data. It has strong similarities with the system developed by Santaren et al. (2021), which assimilates CO<sub>2</sub> data only, and it borrows from Wang (2016) to assimilate <sup>14</sup>CO<sub>2</sub> data. The system relies on:

- An analytical inversion framework as presented in Section 2.1 in which budgets of surface anthropogenic and natural fluxes are controlled at local (city or industrial plant) or regional scales and at hourly resolution (see the definition of the control vector in Section 2.4).
- 85 – A zoomed configuration of the regional atmospheric transport model CHIMERE for most of Western Europe, described in section 2.2.



– Hourly to annual maps of all types of surface CO<sub>2</sub> and <sup>14</sup>CO<sub>2</sub> fluxes, at high spatial resolution from the CO<sub>2</sub> Human Emissions project (CHE, <https://www.che-project.eu/>), which are described in section 2.3, at temporal resolutions up to 1-hour. They are used to distribute the local-to-regional-scale budgets of the fluxes into corresponding high resolution flux maps (see section 2.4).

– Simulations of the location, time and uncertainty of the XCO<sub>2</sub> retrievals and of the CO<sub>2</sub> and <sup>14</sup>CO<sub>2</sub> ground-based data, for different scenarios of the observing system, as described in Section 2.5. For the XCO<sub>2</sub> data, we rely on the simulation of the CO<sub>2</sub>M sampling during one satellite pass over the area of interest generated by the Institut für Umweltphysik (IUPB) in the frame of the ESA-PMIF project (European Spacial Agency, Plume Monitoring Inversion Framework Wang et al., 2020; Lespinas et al., 2020).

Inversions are conducted over a 1-day window from 0:00 to 24:00, on July 1 2015, i.e. in summer when the biogenic fluxes are relatively high. The restriction to 1 day is connected to results of Santaren et al. (2021), which show the lack of sensitivity of observations made during a given day to the fluxes during other days over the modeling domain, and to the large computation cost associated with the preparation of a full day of analytical inversion. With such an inversion window, wider than the one chosen in Broquet et al. (2018) or Santaren et al. (2021), the system tracks the signal from the FF emissions up to 12 hours before the satellite overpass (see Section 2.5.1) and 10 hours before the in-situ data assimilation window (see Section 2.5.2). After a few hours, the air masses having been transported over typically 100 km, the signal from individual FF CO<sub>2</sub> sources (industrial plants, cities, regions) is much diffused and hardly detectable in XCO<sub>2</sub> images. Consequently this 1-day timescale is large enough to represent the full extent of the CO<sub>2</sub> FF plumes that can be exploited in images from CO<sub>2</sub>M-like instruments to compute the corresponding emissions (Broquet et al., 2018; Santaren et al., 2021). The ability to track large-scale budgets of FF emissions over longer time periods relies on complementary observations of FF emission tracers. These tracers, such as the <sup>14</sup>CO<sub>2</sub> measurements considered here, may help filter a relatively low FF signal from the biogenic signal which is generally much larger over long distances (Pinty et al., 2017; Fortems-Cheiney et al., 2021). CO<sub>2</sub> and <sup>14</sup>CO<sub>2</sub> ground-based networks could also reinforce the constraint on the FF CO<sub>2</sub> emission estimates during the few hours before the satellite overpass. By starting the inversion window 12 hours before the satellite overpass and 10 hours before the first surface measurement, we account for the full window of FF CO<sub>2</sub> emission, the estimate of which can potentially be directly constrained by these different datasets or by their combination.

## 2.1 Inversion general equation

Under the assumption that all uncertainties in the inversion problem have a Gaussian and unbiased distribution, these uncertainties are fully characterized by their covariance matrices. The analytical Bayesian inversion allows for the computation of the covariance matrix of the posterior uncertainty (uncertainty in the posterior estimate of the fluxes) **A** as a function of the observation operator **H** connecting the control parameters (the flux budgets, see section 2.4) to the observation vector (the space defined by the ensemble of pseudo observations, see section 2.5), of the covariance matrix of the prior uncertainties (uncertainty in the prior estimate of the fluxes, see section 2.4.2) **B** and of the model and observation errors covariance matrix



120  $\mathbf{R}$  (in the observation space, see section 2.5.3), following Tarantola (2005):

$$\mathbf{A} = [\mathbf{B}^{-1} + \mathbf{H}^T \mathbf{R}^{-1} \mathbf{H}]^{-1} \quad (1)$$

The observation operator  $\mathbf{H}$ , is assumed to be linear and is decomposed, following the notations of Stauffer et al. (2016), into :

$$\mathbf{H} = \mathbf{H}_{sample} \mathbf{H}_{transp} \mathbf{H}_{distr} \quad (2)$$

125  $\mathbf{H}_{distr}$  defines (i) the spatial and temporal distribution of the fluxes within each area corresponding to a control parameter and beyond the temporal resolution of these control parameters, (ii) the flux budgets to be rescaled by the inversion for these areas at the control resolution, and (iii) the application of the isotopic signatures to  $\text{CO}_2$  fluxes. Here,  $\mathbf{H}_{distr}$  is based on the flux products and on the signatures described in Section 2.3.

$\mathbf{H}_{transp}$  is the atmospheric transport operator, corresponding to our configuration of the transport model CHIMERE described in section 2.2.

130  $\mathbf{H}_{sample}$  corresponds to the computation of  $X\text{CO}_2$  and to the sampling of  $X\text{CO}_2$  or of near ground concentrations of  $\text{CO}_2$  and  $^{14}\text{CO}_2$  at the observation time and locations from the output of the CHIMERE model. Section 2.5 provides more details on this operator. The derivation of the  $\mathbf{H}$  matrix in the analytical system requires an extensive set of simulations with the computation of the imprint (columns of  $\mathbf{H}$ ) of each of the control parameters (Santaren et al., 2021).

## 2.2 Atmospheric transport

### 135 2.2.1 Transport model configuration

The transport operator of  $\text{CO}_2$  and  $^{14}\text{CO}_2$  in the atmosphere,  $\mathbf{H}_{transp}$ , relies on the CHIMERE transport model, driven here by the Community Inversion Framework (CIF, Berchet et al., 2021). The domain and the horizontal grid for the CHIMERE configuration used here are represented in Figure 1. They cover a part of Western Europe (longitude:  $-6.82^\circ$  to  $19.18^\circ$ ; latitude:  $42.0^\circ$  to  $56.39^\circ$ ). The resolution of the horizontal grid varies between 50 and 2 km. The  $2\text{ km} \times 2\text{ km}$ -resolution zoom covers Northern France, Luxemburg, Belgium, a large part of the Netherlands and Western Germany (longitude:  $-1.25^\circ$  to  $10.64^\circ$ ; latitude:  $47.45^\circ$  to  $53.15^\circ$ ). The vertical grid is composed of 29 pressure layers extending from 1007 hPa to 300 hPa (from the surface to approximately 9 km above the ground level).

Our configuration of CHIMERE ignores chemistry since  $\text{CO}_2$  and  $^{14}\text{CO}_2$  are inert species at the time scale considered in this study (24 h). This explains why the resulting atmospheric transport operator  $\mathbf{H}_{transp}$  is assumed to be linear. It is forced by meteorological variables provided by the European Centre for Medium-Range Weather Forecasts (ECMWF) for the CHE project at 9 km resolution (Agusti-Panareda, 2018). Figure 2 provides indications on the typical horizontal transport conditions during the day of inversions over the area of interest: on July 1<sup>st</sup> 2015, a South-East wind over the North East part of the domain spreads the atmospheric signature of FF emissions in the North-West direction.

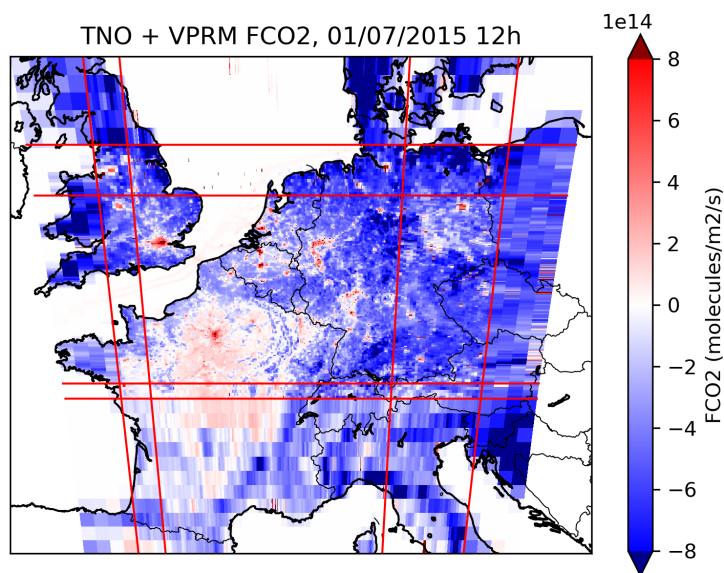

**Figure 1.** CO<sub>2</sub> flux map (based on values from the TNO inventory and VPRM simulations for 1 July 2015 at 12:00) over the atmospheric transport modelling grid. The red lines delimit the spatial resolution changes within the domain (from 2 km to 10 km and then 50 km from the middle to the edges of the domain)

### 2.2.2 Simulation of CO<sub>2</sub> and <sup>14</sup>CO<sub>2</sub> transport

150 In this section, we present a formal decomposition of the CO<sub>2</sub> and <sup>14</sup>CO<sub>2</sub> transport in order to introduce the notation and assumptions used in the inversion framework. The decomposition of the <sup>14</sup>CO<sub>2</sub> transport and its formulation in a specific unit (parts per million per mil, ppm ‰) follow that of Wang (2016).

$$C_{a,CO_2} = \mathbf{H}_{transp} [F_{FF,CO_2} + F_{BF,CO_2} + F_{NPP,CO_2} + F_{HR,CO_2}] + H_{bc} [C_{bc,CO_2}] \quad (3)$$

$$C_{a,CO_2} \cdot \delta_a = \mathbf{H}_{transp} [\delta_{FF} \cdot F_{FF,CO_2} + \delta_{BF} \cdot F_{BF,CO_2} + \delta_{NPP} \cdot F_{NPP,CO_2} + \delta_{HR} \cdot F_{HR,CO_2} + 1/R_{std} \cdot F_{Nuc}^{14C}] + H_{bc} [C_{bc,14CO_2} \cdot \delta_{bc}] \quad (4)$$

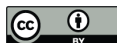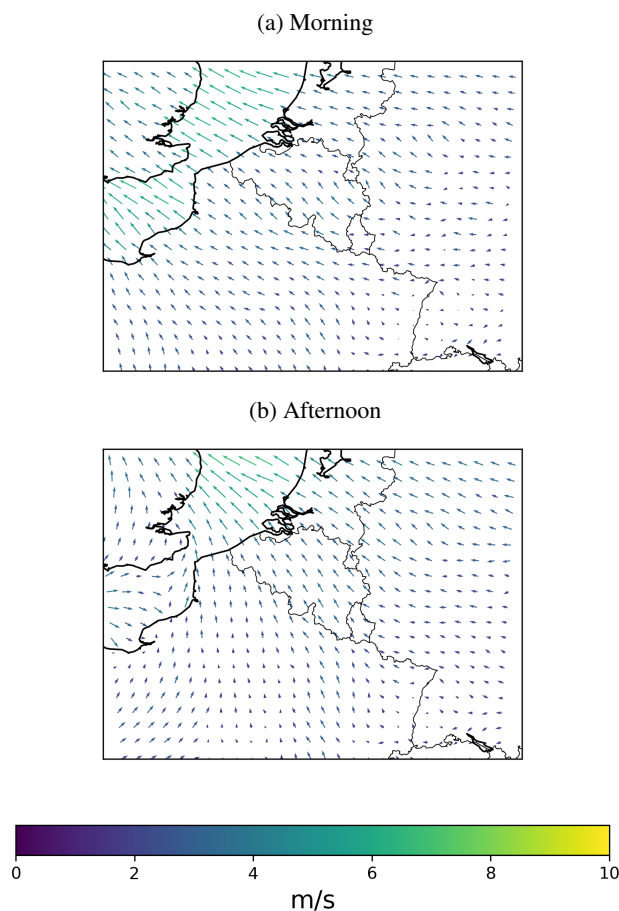

**Figure 2.** Morning (a) and afternoon (b) wind averaged in the first two vertical layers of the CHIMERE grid (i.e., heights between 0 and 28 m above the ground)

155 where:

- $C_{a,CO_2}$  is the  $CO_2$  atmospheric concentration.
- $F_x$  terms correspond to different types  $x$  of  $CO_2$  fluxes within the transport modelling domain: FF emissions, BF emissions, NPP and HR.
- $C_{bc,x}$  are the boundary (top and lateral) and initial conditions of  $CO_2$  and  $^{14}CO_2$  concentrations, and  $H_{bc}$  their transport within the modeling domain, but they are ignored in this inversion study (see Section 2.3.3).
- $\delta_a$  are the  $^{14}CO_2/^{12}CO_2$  ratios in the atmosphere ( $R$ ), normalized by the  $^{14}C/^{12}C$  ratio in the Modern Standard ( $(R/R_{std} - 1); R_{std} = 1.176 \times 10^{-12}$ ). Similarly, in the following, all  $\delta$  are also normalized ratios.
- $\delta_x$  isotopic signature of the  $^{14}CO_2$  fluxes listed above.

160



–  $F_{Nuc}^{14}$  corresponds to  $^{14}\text{CO}_2$  fluxes from nuclear power plants.

## 165 2.3 Flux maps

### 2.3.1 $\text{CO}_2$ flux maps

The anthropogenic  $\text{CO}_2$  emissions, from both FF and BF combustion, are derived from two inventories of the annual emissions produced by Netherlands Organisation for Applied Scientific Research (TNO) over Europe for the year 2015 (Denier van der Gon et al., 2017; Super et al., 2020). The emissions in the 2-km-resolution area of the domain are interpolated from a  $\sim 1$  km ( $1/60^\circ \times 1/120^\circ$ ) resolution inventory (TNO\_GHGco\_1x1km\_v1\_1) which entirely covers this area but not the whole CHIMERE domain (its extent being  $-2^\circ$  to  $19^\circ$  in longitude and  $47^\circ$  to  $56^\circ$  in latitude). The emissions in the rest of the CHIMERE domain are interpolated from a  $\sim 6$  km ( $1/10^\circ \times 1/20^\circ$ ) resolution inventory (TNO\_GHGco\_v1\_1, covering  $-30^\circ$  to  $60^\circ$ , in longitude and  $30^\circ$  to  $72^\circ$  in latitude). These data are projected on the CHIMERE horizontal grid ensuring mass-conservation. The temporal disaggregation at hourly scale is based on coefficients depending on the sector of activity and the time zone provided in the CHE project (Marshall et al., 2019). Emissions from point sources are projected on the CHIMERE vertical grid depending on activity sectors while emissions from diffused sectors of activity (traffic, heating etc.) are emitted from the ground in the model.

No distinctions between  $\text{CO}_2$  BF emissions from woods and crops is done in the TNO inventories. However this split is needed to derive  $^{14}\text{CO}_2$  fluxes (see below). Consequently, assumptions are made based on emission categories used in TNO inventory, i.e. the Gridded Nomenclature For Reporting (GNFR) of the United Nations Framework Convention on Climate Change (UNFCCC). In this study, we consider that BF from woods is burned in power plants and in the industry and residential sectors only, i.e. in categories A to C. BF from crops is burned in categories F and L only, that correspond to road transport and agriculture. We assume that the BF emissions from the other sectors are negligible since they represent less than 2 % of the total BF emissions in the vast majority of countries.

The  $\text{CO}_2$  biogenic fluxes are interpolated from simulations at 1 h and 5 km resolution with the VPRM model (Vegetation Photosynthesis and Respiration Model, Mahadevan et al., 2008) for the year 2015, provided by MPI-Jena over Europe (over latitude  $31^\circ$  to  $68.7^\circ$ ; longitude  $-35.5^\circ$  to  $60.5^\circ$ ). The VPRM simulations provide estimates of gross primary production (GPP) and total respiration. Daily partition coefficients ( $\alpha_{HR}$ ) are derived from ORCHIDEE-MICT simulations at  $0.5^\circ$  resolution over Europe in 2015 (Guimberteau et al., 2018) to scale GPP and Respiration from VPRM into NPP and HR fluxes. The total biogenic fluxes correspond to the Net Ecosystem Exchange ( $\text{NEE} = \text{NPP} + \text{HR} = \text{GPP} + \text{Resp}$ ).

The total  $\text{CO}_2$  fluxes for 1<sup>st</sup> July 2015 at 12:00 are presented in Figure 1.

### 2.3.2 Isotopic signatures and $^{14}\text{CO}_2$ flux maps

To produce  $^{14}\text{CO}_2$  fluxes, corresponding isotopic signatures are applied to the  $\text{CO}_2$  fluxes.



$\delta_{FF} = -1000\text{‰}$  was applied to  $F_{FF}$  on the whole year and domain.

We distinguish  $\delta_{BF,wood}$  from  $\delta_{BF,crop}$  because crops and wood have a different age at harvest resulting in different  $^{14}\text{C}$  abundance. In a first approximation, we determined these  $\delta_{BF}$  as a spatial and temporal average of  $^{14}\text{CO}_2$  contains in vegetation,  $\delta_{biomass}$ , simulated with the emulator of the ORCHIDEE-MICT model (Guimberteau et al., 2018; Naipal et al., 2018; Wang, 2016) over the whole ORCHIDEE-MICT Europe domain in 2015, selecting the relevant plant functional types (PFT): non-tropical trees for  $\delta_{BF,wood}$  or crops for  $\delta_{BF,crop}$ . Such a computation of  $\delta_{BF}$  relies on the hypothesis that the wood or cropfuel burnt in Europe comes from European (López et al., 2017) and recently cut vegetation. As a result,  $\delta_{BF,wood} = 95\text{‰}$  and  $\delta_{BF,crop} = 19\text{‰}$ .

205

$\delta_{NPP}$  monthly maps at 5 km spatial resolution were derived for application to the VPRM biogenic fluxes:

$$\delta_{NPP} = \delta_{a,surf} - \epsilon \quad (5)$$

where  $\delta_{a,surf}$  is the radiocarbon signature in the surface atmospheric layer and  $\epsilon$  is the sum of kinetic and enzymatic  $^{14}\text{CO}_2$  fractionation with respect to  $^{12}\text{CO}_2$  depending on the C3 or C4 photosynthesis pathway of the vegetation.

$\delta_{a,surf}$  is characterized by a conversion of  $^{14}\text{C}$  monthly background measurements at Schauinsland in Germany, in 2015 (Hammer and Levin, 2017) following Stuiver and Polach (1977) with  $\delta_{13C}$  from Graven et al. (2017). This ratio varies between 46 and 49 ‰. Here, we neglect the impact of variations of this  $\delta_{a,surf}$  at high spatial and temporal resolution on the  $^{14}\text{CO}_2$  NPP fluxes themselves. Accounting for such variations for a precise computation of the  $\delta_{NPP}$ , and so  $^{14}\text{CO}_2$  NPP fluxes, would have required a dynamical computation with  $\delta_{a,surf}$  depending on  $^{14}\text{CO}_2$  concentrations calculated by the transport model and would have introduced strong non-linearities in the inversion (with an evolving H). However, over one day, these variabilities are assumed to be negligible as was found by Wang (2016) within each region-month.

215

The value of  $\epsilon$  is 36 ‰ for C3 vegetation and 8 ‰ for C4 vegetation as described by Wang (2016) from Farquhar et al. (1989) and Degens (1969). We derive the C3/C4 distribution on the VPRM grid and per month, from the combination of three land cover maps: the VPRM and ORCHIDEE land cover maps and monthly MIRCA2000 crop map (Portmann et al., 2010). This combination allows us to capitalise on the high spatial resolution of the VPRM land cover map at 5 km derived from SYNMAP at 1-km-resolution (Jung et al., 2006) and a more precise PFT information in ORCHIDEE land cover maps at  $0.5^\circ$  resolution to determine the C3 or C4 photosynthesis type. In case of the crop PFT, the MIRCA2000 crop map at  $\sim 0.08^\circ$ -resolution indicates the surface area covered by each crop type, and thus the relevant photosynthesis type, with a finer resolution than in ORCHIDEE and with the monthly variability of the year 2000. The resulting  $\delta_{NPP}$  varies between 10 and 41 ‰.

225

$\delta_{HR}$  daily maps for the year 2015 are derived from simulations with the above-mentioned ORCHIDEE-MICT emulator. For each grid cell, the daily  $\text{CO}_2$  and the corresponding  $^{14}\text{CO}_2$  emissions from litter respiration and 3 types of soil respiration were aggregated. Their ratio,  $\delta_{HR}$ , is then interpolated from the ORCHIDEE-MICT grid to the VPRM grid. The resulting  $\delta_{HR}$





varies between 22 and 177 %.

230

Nuclear  $^{14}\text{C}$  emissions are simply calculated following Graven and Gruber (2011) based on the annual activity of each reactor, in 2015, reported in Zazzeri et al. (2018). For each reactor, activity data  $A$  in  $\text{TBq}\cdot\text{yr}^{-1}$  is converted into  $^{14}\text{C}$  production in  $\text{kg}^{14}\text{C}\cdot\text{reactor}^{-1}\cdot\text{yr}^{-1}$ :

$$F_{\text{Nucl}}^{14\text{C}} = A \times \alpha \times 10^9 \quad (6)$$

235 with  $\alpha = R_{\text{std}}/0.226$ , where  $0.226 \text{ Bq}\cdot\text{gC}^{-1}$  is the conversion factor from activity to carbon production.

### 2.3.3 Ignoring ocean fluxes, cosmogenic production, biomass burning emissions and the regional boundary conditions

The impact of uncertainty in the initial condition (at 0:00 on July 1 2015) and at the boundary conditions (at the lateral and top boundaries of the CHIMERE domain) are assumed to be negligible following the results from Santaren et al. (2021): these conditions are thus ignored in the definition of our inversion problem.

240 Regarding the  $\text{CO}_2$  (and thus  $^{14}\text{CO}_2$ ) ocean fluxes, we also assume that they can be neglected here because the CHIMERE domain is mostly continental.

The cosmogenic production of  $^{14}\text{C}$  becomes significant above  $\sim 700$  hPa, well above the planetary boundary layer (Turnbull et al., 2009), while we are interested in simulating  $^{14}\text{CO}_2$  concentrations near the ground. Even though we use some high-altitude stations, we can assume that most of the influence from the cosmogenic production at these surface stations comes  
245 from the model lateral boundaries and that the cosmogenic production within the modelling domain can be neglected.

$\text{CO}_2$  and  $^{14}\text{CO}_2$  biomass burning emissions are also neglected since they are generally relatively weak in our modelling domain (especially in the 2-km resolution part of the modelling grid on which the analysis focuses).

## 2.4 Control Vector

### 2.4.1 Definition of the Control Vector

250 The control vector is spatialized based on a decomposition of the flux maps into large or administrative regions, large urban areas and large industrial plants.

The study focuses on a set of 23 regions, called “the main area of interest” hereafter: the nine administrative regions of Belgium, Luxemburg, seven administrative regions of the southern Netherlands, three administrative regions in northern France and three administrative regions in western Germany (all comprised in the  $2 \text{ km} \times 2 \text{ km}$ -resolution zoom of the CHIMERE  
255 grid, see Figure 3).

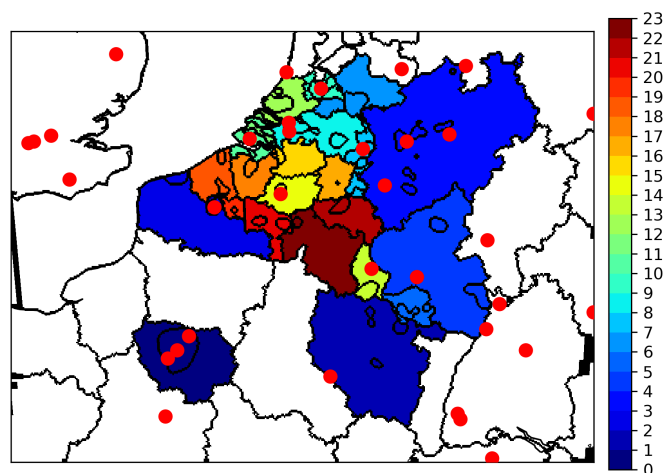

**Figure 3.** Main area of interest i.e. the 23 administrative regions where major urban areas (contours of the urban areas also represented here) and point sources emissions are controlled separately for anthropogenic emissions in the  $2 \text{ km} \times 2 \text{ km}$ -resolution zoom of the CHIMERE transport model. The names of these administrative regions are listed in Table 1. Ground-based  $^{14}\text{CO}_2$  and  $\text{CO}_2$  observation sites are also shown (red dots, see Fig. 6, for the network on the whole domain).



**Table 1.** List of areas of control in the main area of interest and corresponding number of stations in these areas.

| Number | Area Name              | Number of Stations |
|--------|------------------------|--------------------|
| 1      | Île-de-France          | 3                  |
| 2      | Lorraine               | 1                  |
| 3      | Nord-Pas-de-Calais     | 1                  |
| 4      | North Rhine Westphalia | 3                  |
| 5      | Rhineland-Palatinate   | 1                  |
| 6      | Saarland               | 0                  |
| 7      | Gelderland             | 0                  |
| 8      | Limburg                | 1                  |
| 9      | North Brabant          | 3                  |
| 10     | Utrecht                | 1                  |
| 11     | Zeeland                | 1                  |
| 12     | Sheldt (see)           | 0                  |
| 13     | South Holland          | 0                  |
| 14     | Luxemburg              | 1                  |
| 15     | Brabant/Bruxelles      | 1                  |
| 16     | Anvers                 | 0                  |
| 17     | Limburg                | 0                  |
| 18     | East Flanders          | 0                  |
| 19     | West Flanders          | 0                  |
| 20     | West Hainaut           | 0                  |
| 21     | East Hainaut           | 0                  |
| 22     | Liege                  | 0                  |
| 23     | Namur/Luxembourg       | 0                  |

In this main area of interest, the CO<sub>2</sub> FF emission budgets from major industrial plants (22 plants for which the annual emissions exceed 1 MtC for CO<sub>2</sub>, FF<sub>PS</sub>, see the red dots in Figure 3) and the FF, BF<sub>wood</sub> and BF<sub>crop</sub> CO<sub>2</sub> emission budgets from the large urban areas (the 42 urban areas represented in Figure 3) are controlled separately. In each of these 23 regions, the budget of the rest of the FF, BF<sub>wood</sub> and BF<sub>crop</sub> CO<sub>2</sub> emissions are controlled separately. Outside this main area of interest, the FF, BF<sub>wood</sub> and BF<sub>crop</sub> CO<sub>2</sub> emission budgets of 43 administrative or larger regions are controlled (Fig. 4).

260

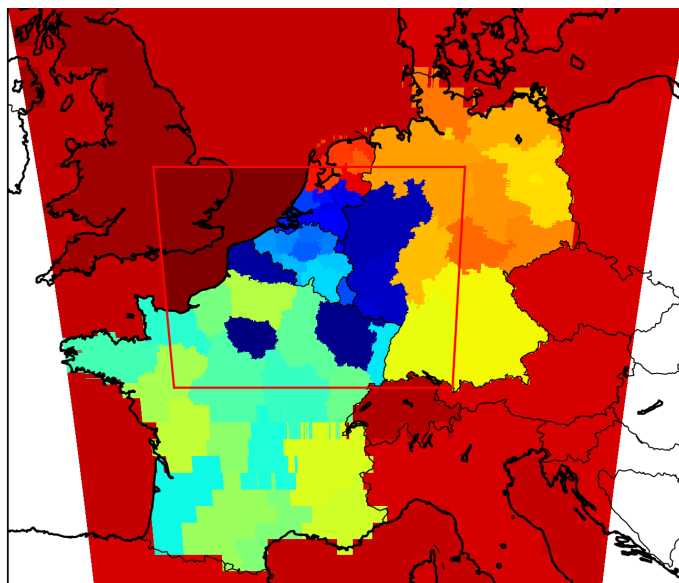

**Figure 4.** Administrative regions and coarser areas for which the biogenic flux budgets, and the anthropogenic emission budgets (with more details for regions highlighted in Figure 3) are controlled. The red line delimits the  $2\text{ km} \times 2\text{ km}$ -resolution zoom of the CHIMERE transport model.

Single  $^{14}\text{C}$  signatures of the  $\text{BF}_{wood}$  and  $\text{BF}_{crop}$  fluxes are controlled assuming that they apply over the whole modelling domain. The  $^{14}\text{C}$  fluxes from 47 nuclear power plants, across the whole modeling domain, are separately controlled.

Biogenic fluxes and isotopic signatures (NPP, HR and  $\delta_{HR}$ ) are only controlled at the resolution of the 66 administrative regions and larger areas (23 in the main area of interest and 42 outside, Fig. 4), i.e., the spatial resolution of the control vector is nearly the same as for anthropogenic emissions but it does not isolate urban areas and major point sources.

The control vector is actually composed of scaling factors to be applied to maps of local (from plant and urban area) and regional fluxes from the products presented in Section 2.3 over these spatial control areas at a 1-hour temporal resolution except for the  $^{14}\text{C}$  signature of the HR, of wood burning and of crops BF emissions which are controlled at the daily scale. The composition of the control vector is summarized in Table 2.



**Table 2.** Number of parameters in the control vector. The control vector is composed of scaling factors to be applied to budgets and maps of local and regional fluxes from the products presented in Section 2.3 ( $FF_{PS}$ ,  $FF_{other}$ ,  $BF_{crop}$ ,  $BF_{wood}$ , NPP, HR,  $^{14}C_{BF_{crop}}$ ,  $^{14}C_{BF_{wood}}$ ,  $^{14}C_{HR}$  and Nucl). This table gives number and type of areas in the control vector: 66 administrative or coarser regions (Reg) defined in Figure 4 and more detailed areas in the main area of interest. PS: point source emissions, UA: large urban area emissions, NUA: non urban area i.e the rest of the region when excluding the UA and Domain: whole domain budget. In a 24h-inversion-window, 24 temporal parameters correspond to 1h temporal resolution and 1 parameter correspond to daily resolution.

|                            | $FF_{PS}$                | $FF_{other}$ | $BF_{crop}$     | $BF_{wood}$     | NPP             | HR     | $^{14}C_{BF_{crop}}$ | $^{14}C_{BF_{wood}}$ | $^{14}C_{HR}$ | $F_{Nucl}$ |       |
|----------------------------|--------------------------|--------------|-----------------|-----------------|-----------------|--------|----------------------|----------------------|---------------|------------|-------|
| Spatial                    | in Main Area of Interest | 22 PS<br>-   | 42 UA<br>23 NUA | 42 UA<br>23 NUA | 42 UA<br>23 NUA | 66 Reg | 66 Reg               | 1 Domain             | 1 Domain      | 66 Reg     | 47 PS |
|                            | outside                  |              | 43 Reg          | 43 Reg          | 43 Reg          |        |                      |                      |               |            |       |
|                            | Total                    | 22           | 108             | 108             | 108             | 66     | 66                   | 1                    | 1             | 66         | 47    |
| Temporal                   | 24                       | 24           | 24              | 24              | 24              | 24     | 1                    | 1                    | 1             |            |       |
| Total                      | 528                      | 2592         | 2592            | 2592            | 1584            | 1584   | 1                    | 1                    | 66            | 1128       |       |
| <b>Control Vector Size</b> | <b>1128</b>              |              |                 |                 |                 |        |                      |                      |               |            |       |

## 270 2.4.2 Prior error covariance matrix **B**

**B** is built assuming a 3-hour temporal auto-correlation of the prior uncertainty in hourly budgets for each type of controlled flux. An exponentially decaying function is used to model these temporal correlations:  $e^{-d/3}$ , where  $d$  is the time lag, expressed in hours, between two hourly fluxes. We also assume that there is no correlation of the prior uncertainties in space (between different point sources, urban areas and regions) or between different types of fluxes or isotopic signatures. The standard deviations of the prior uncertainties in control parameters for individual spatial areas at daily scale are set to 30% for FF and BF emissions, to 100% for  $^{14}C$  signatures and to 60% for biogenic fluxes (Table 3). The resulting standard deviations of prior uncertainty in regional 24-h, morning and afternoon budgets of FF emissions in the main area of interest range from 10 to 45% (Table 4).

**Table 3.** Standard deviations of the prior uncertainties in 24-h budgets of fluxes or in isotopic signatures for each control area.

|                       | $FF_{PS}$ | $FF_{other}$ | $BF_{crop}$ | $BF_{wood}$ | NPP | HR | $^{14}C_{BF_{crop}}$ | $^{14}C_{BF_{wood}}$ | $^{14}C_{HR}$ | Nucl |
|-----------------------|-----------|--------------|-------------|-------------|-----|----|----------------------|----------------------|---------------|------|
| Prior uncertainty (%) | 30        | 30           | 30          | 30          | 60  | 60 | 100                  | 100                  | 100           | 100  |

## 2.5 Observation vector and corresponding sets of experiments

### 280 2.5.1 Satellite observations from an XCO<sub>2</sub> spectral imager similar to CO2M

Some of the experiments assimilate pseudo retrievals of XCO<sub>2</sub> from a single orbit of a CO2M-like satellite passing over Western Europe at 12:00 UTC. The simulation of these XCO<sub>2</sub> satellite observations is based on the simulations of the CO2M 2-km-resolution sampling, with a ~300 km swath, and L2 error statistics in the surface and atmospheric conditions for the



**Table 4.** Range of standard deviations of the prior uncertainty in regional 24-h, morning and afternoon budgets of FF emissions in the main area of interest. These budgets include the urban areas and point sources within the regions

| Prior uncertainty in regional budget (%) | 24-h | Morning | Afternoon |
|------------------------------------------|------|---------|-----------|
| Min                                      | 10   | 15      | 16        |
| Mean                                     | 20   | 29      | 31        |
| Max                                      | 30   | 43      | 45        |

285 year 2014 from the ESA-PMIF project (Wang et al., 2020; Lespinas et al., 2020). These simulations account for cloud cover  
which is moderate for the selected orbit (Figure 5). The observation vector is defined by the individual cloud free pixels of the  
satellite. The extraction of this observation vector from the model outputs is made by selecting the model grid cells in which  
the centres of these pixels are located. The spatial resolution of our transport model in the area of interest is similar to that  
of the satellite observation. However, since the satellite ground pixels do not perfectly correspond to the model grid cells in  
this area, some model grid cells can correspond to several observations. In the coarser part of the model grid, model grid cells  
290 correspond to several observations.

XCO<sub>2</sub> is computed from the CHIMERE 3D fields of CO<sub>2</sub> following the rationale of Santaren et al. (2021), notably assuming  
a constant vertical weighting function:

$$X_{CO_2}(lat, lon) = \frac{\overline{CO_2(P_{top})} \times P_{top} + \int_{P_{top}}^{P_{surf}(lat, lon)} (CO_2(lat, lon, P) \times dP)}{P_{surf}(lat, lon)} \quad (7)$$

295 where *lat* and *lon* are the latitude and the longitude, respectively, *P* is the atmospheric pressure. *P<sub>surf</sub>* is the surface pressure  
and *P<sub>top</sub>* (300 hPa) is the pressure at the top boundary of the model. For pressures lower than *P<sub>top</sub>*, we assume that the CO<sub>2</sub>  
concentrations equal the horizontal average of the top-level mixing ratios in CHIMERE ( $\overline{CO_2(P_{top})}$ ).

### 2.5.2 Ground-based network

We use a surface network (Fig. 6) of which 113 stations in our modelling domain are located following the scenario proposed  
by Marshall et al. (2019). This scenario is based on existing continuous CO<sub>2</sub> measurement sites of the Integrated Carbon  
300 Observation System (ICOS, <https://www.icos-cp.eu/>) or other air sampling stations of the National Oceanic and Atmospheric  
Administration (NOAA) and of the Global Atmosphere Watch Programme of World Meteorological Organization (GAW,  
<https://community.wmo.int/activity-areas/gaw>). We assume that these stations have appropriate infrastructures and locations to  
observe atmospheric CO<sub>2</sub> and <sup>14</sup>CO<sub>2</sub>. In order to complement this first network, local meteorological or air quality sampling  
stations, or local science and engineering faculties were also chosen.

305 The sampling height at these stations ranges between 10 and 344 m above the ground level. We assume that all stations  
of this network measure simultaneously CO<sub>2</sub> and/or <sup>14</sup>CO<sub>2</sub>. Each virtual site is assumed to provide hourly CO<sub>2</sub> data that are  
assimilated between 10:00 and 17:00 UTC and/or a 7-hour-average sample of <sup>14</sup>CO<sub>2</sub> over 10:00-17:00 UTC, following the

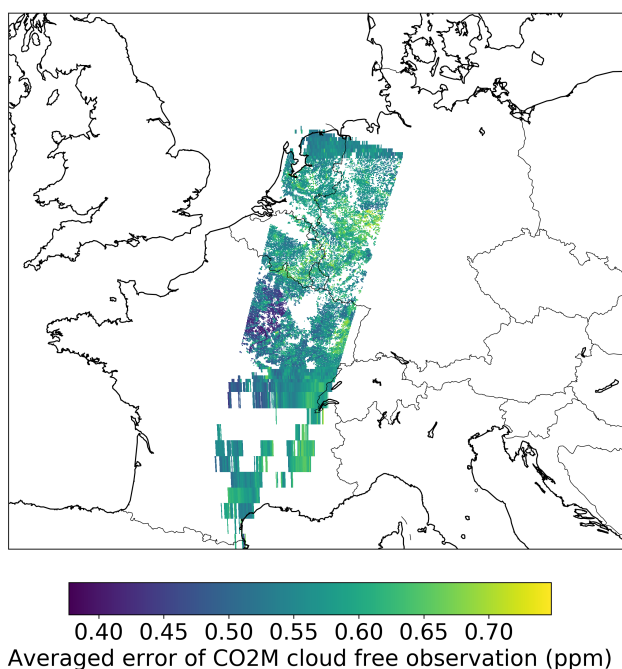

**Figure 5.** Simulation of the XCO<sub>2</sub> sampling and observation error standard deviation (by IUPB in the ESA-PMIF project) for a selected orbit of the spectral imaging satellite, in parts per million (ppm).

common practice of assimilating data only when the planetary boundary layer (PBL) is well developed (Proquet et al., 2011). The availability of CO<sub>2</sub> 7-hour averages when deriving <sup>14</sup>CO<sub>2</sub> 7-hour averages from air samples is ignored.

### 310 2.5.3 Observation error covariance matrix **R**

The matrix **R** combines the uncertainty in the data that are assimilated and the corresponding uncertainty from the observation operator. Here we assume that the uncertainty in the observation operator is dominated by that of the transport model and we ignore temporal and spatial auto-correlations in these uncertainties. For individual data, the standard deviation of the observation error is therefore:

$$315 \quad \sigma_{obs} = \sqrt{\sigma_{meas}^2 + \sigma_{mod}^2} \quad (8)$$

For satellite observations,  $\sigma_{meas}$  is the uncertainty in the CO<sub>2</sub>M XCO<sub>2</sub> data as simulated by IUPB. These values are represented in Figure 5.  $\sigma_{mod}$  is taken as 1 ppm for individual data (Basu et al., 2018; Marshall et al., 2019). As described in Section 2.5, since the satellite ground pixels do not perfectly correspond to the model grid cells, some model grid cells can correspond



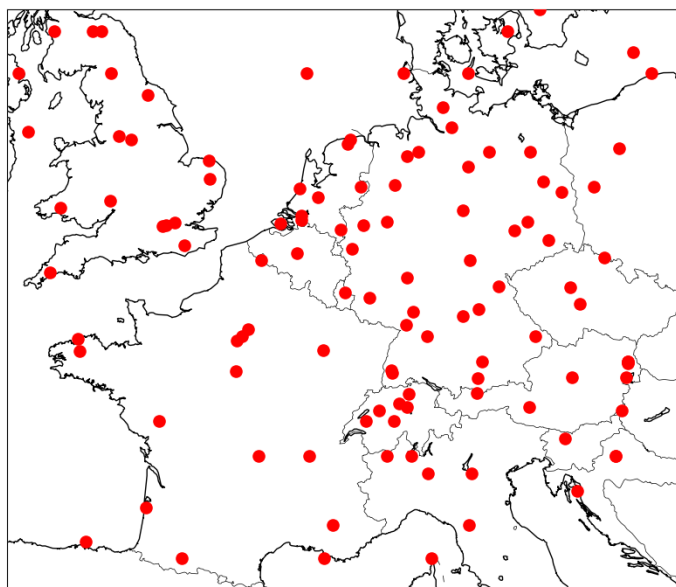

**Figure 6.** Ground-based  $^{14}\text{CO}_2$  and  $\text{CO}_2$  observation networks. 113 stations located following the scenario proposed by Marshall et al. (2019), based on real or potential observation networks (ICOS, NOAA, GAW, more details in section 2.5.2).

to several observations. We assume that the observation errors are uncorrelated: the aggregation of  $N$  observations results in  
320 decreasing errors by a factor  $1/\sqrt{N}$ .

For the near surface  $\text{CO}_2$  and  $^{14}\text{CO}_2$  observations, the configuration of  $\sigma_{meas}$  follows the guidelines of Marshall et al. (2019, Tables 5-1 to 5-3):

- The uncertainty in  $\text{CO}_2$  hourly measurements is taken as the target measurement uncertainty,  $\sigma_{\text{CO}_2, meas} = 0.05$  ppm.
  - The 1-sigma uncertainty on  $^{14}\text{CO}_2$  7-hour data is taken as 200 ppm ‰, based on the following uncertainty propagation:
- 325

$$\sigma_{^{14}\text{CO}_2, meas} = \sqrt{(\text{CO}_2 \times \sigma_{\delta^{14}\text{C}, obs})^2 + (\delta_{^{14}\text{C}, a} \times \sigma_{\text{CO}_2, obs} / \sqrt{7})^2} \quad (9)$$

with

- $\text{CO}_2$  the atmospheric concentration set to 400 ppm
- the atmospheric  $\delta_{^{14}\text{C}, a}$  set to 40 ‰



- 330
- $\sigma_{CO_2, meas}/\sqrt{7}$ , the  $CO_2$  measurement uncertainty at the 7-hour scale, assuming that there is no autocorrelation in the  $CO_2$  measurement errors at the hourly scale
  - $\sigma_{\delta^{14}C, meas} = 0.5\%$ , the  $\delta^{14}C$  measurement uncertainty at the 7-hour scale

We use the estimate of the model error from Marshall et al. (2019, Table 5-3):  $\sigma_{CO_2, model} = 1$  ppm and  $\sigma^{14}CO_2, model = 1.26 \times 10^{-12}$  ppm multiplied by station class multipliers from 1 to 5 depending on the type of station. For  $^{14}CO_2$ , the conversion was done from ppm to ppm  $\sigma$  by multiplying by  $1000/R_{std}$ . Ignoring auto correlations in the model error at the hourly scale, the model error for 7-hour  $^{14}CO_2$  mean concentration data is taken as  $1/\sqrt{7}$  times the model error derived at the 1-hour scale.

The range of the resulting error statistics on the different types of data and from the model are reported in Table 5.

**Table 5.** Data, model, and observation operator 1-sigma uncertainty

| Error               | Near-surface |             |             | Satellite    |       |              |
|---------------------|--------------|-------------|-------------|--------------|-------|--------------|
|                     | Meas         | Model       | Obs         | Meas         | Model | Obs          |
| $CO_2$ (ppm)        | 0.05         | 1 to 5      | 1 to 5      | 0.38 to 0.75 | 1     | 1.07 to 1.11 |
| $^{14}CO_2$ (ppm ‰) | 200          | 405 to 2025 | 451 to 2034 |              |       |              |

## 2.5.4 List of experiments

Table 6 provides labels for the different sets of experiments as a function of the sets of pseudo observations that are assimilated, using or combining the satellite data, the surface  $CO_2$  data and/or the surface  $^{14}CO_2$  data.

**Table 6.** List of performed experiments

| Inversion System Observations                                              | Name                         |
|----------------------------------------------------------------------------|------------------------------|
| Satellite XCO <sub>2</sub>                                                 | INV-SAT                      |
| Surface CO <sub>2</sub>                                                    | INV-CO <sub>2</sub>          |
| Surface $^{14}CO_2$                                                        | INV-14C                      |
| Satellite XCO <sub>2</sub> + Surface CO <sub>2</sub>                       | INV-SAT-CO <sub>2</sub>      |
| Satellite XCO <sub>2</sub> + Surface $^{14}CO_2$                           | INV-SAT-14C                  |
| Satellite XCO <sub>2</sub> + Surface CO <sub>2</sub> + Surface $^{14}CO_2$ | INV-SAT-CO <sub>2</sub> -14C |

340

## 2.6 Diagnostics

When analysing the results from the inversions and assessing the potential of the different types of observation networks, we focus on the standard deviation of the prior and posterior uncertainties in flux budgets, and on their relative difference (called uncertainty reduction or UR hereafter):

345 
$$UR = 1 - \frac{\sigma_{post}}{\sigma_{prior}} \quad (10)$$



Hereafter, when analysing temporal budgets of uncertainties, “morning” and “afternoon” are used to designate 6:00-13:00 and 13:00-19:00 UTC, respectively. Our analyses are focused on budgets for regions in the 2-km-resolution area and more particularly in the main area of interest as defined in Figure 3.

To evaluate the impact of ground-based networks, we also define  $\Delta UR_{Test}^{Ref}$  as the difference between UR for 24-h FF regional budgets, with a test configuration and UR with a reference configuration:  $\Delta UR_{Test}^{Ref} = UR_{test} - UR_{Ref}$ . In these cases the reference configurations are the ones when assimilating the data from the satellite track, either alone or with CO<sub>2</sub> data from the ground network (INV-SAT and INV-SAT-CO2 see Table 6).

### 3 Results

#### 3.1 Potential of the satellite observations as a standalone observation system

This section describes results when assimilating the data from the satellite track only, i.e. results from the INV-SAT inversion.

##### 3.1.1 General results in the morning

This section focuses on results on morning budgets for which the constraint in the inversion from the satellite observation is the highest. Indeed, the maximal UR for regional morning budgets reaches 32% against 3% for afternoon budgets (Table 7).

**Table 7.** Best score statistics of the uncertainty reductions and the posterior uncertainty in inversions with and without NEE, for regional 24-h, morning and afternoon FF emission regional budgets. In the main area of interest, the budgets combine emissions from urban areas, large plants and the more diffuse regional sources.

|             |           | Uncertainties (%) | INV-SAT | INV-CO2 | INV-SAT-CO2 | INV-14C | INV-SAT-CO2-14C |
|-------------|-----------|-------------------|---------|---------|-------------|---------|-----------------|
| With NEE    | 24-h      | UR max            | 18,4    | 12.6    | 23,6        | 23.0    | 32,9            |
|             |           | Post min          | 8,0     | 8.6     | 7,5         | 7.6     | 6,6             |
|             | Morning   | UR max            | 32,4    | 17.7    | 37,8        | 32.7    | 50,8            |
|             |           | Post min          | 10,0    | 12.2    | 9,2         | 10.0    | 7,3             |
|             | Afternoon | UR max            | 2,9     | 14.7    | 15,8        | 10.8    | 20,5            |
|             |           | Post min          | 15,6    | 14.9    | 14,6        | 15.1    | 14,0            |
| Without NEE | 24-h      | UR max            | 32.2    | 26.4    | 39.2        | 23.4    | 40.7            |
|             |           | Post min          | 6.7     | 7.2     | 6.0         | 7.5     | 5.8             |
|             | Morning   | UR max            | 59.9    | 36.9    | 64.4        | 33.3    | 66.0            |
|             |           | Post min          | 5.9     | 9.3     | 5.3         | 9.9     | 5.0             |
|             | Afternoon | UR max            | 3.9     | 17.0    | 17.0        | 10.8    | 21.2            |
|             |           | Post min          | 15.5    | 13.7    | 13.4        | 15.1    | 13.2            |



Figure 7 shows the example of a panel of URs from INV-SAT, for the morning budget of CO<sub>2</sub> fluxes, at the scale of point  
360 sources to that of regions. The URs for the morning budgets of large industrial plant emissions (FF<sub>PS</sub>) are significant in  
the satellite field of view (FOV, corresponding to the vertical projection of the satellite image on the ground), with values  
larger than 50% (Fig. 7a), but is marginal outside this FOV. The northwest direction of the wind on the day of analysis (see  
Section 2.2) explains that the observation footprint appears to be slightly extended out of this FOV, in the east, with, for  
example, significant UR in the region of Essen. URs are also significant for other fossil fuel emission budgets (FF<sub>other</sub>) and  
365 HR (heterotrophic respiration, as defined above) in the satellite FOV with URs up to 50% and more. The UR for NPP is much  
larger than for the other fluxes since this flux is relatively large in July. The UR for BF emissions is generally much smaller  
than for the FF emissions. The much weaker level of emission related to BF combustion explains the lack of UR for this type  
of fluxes.

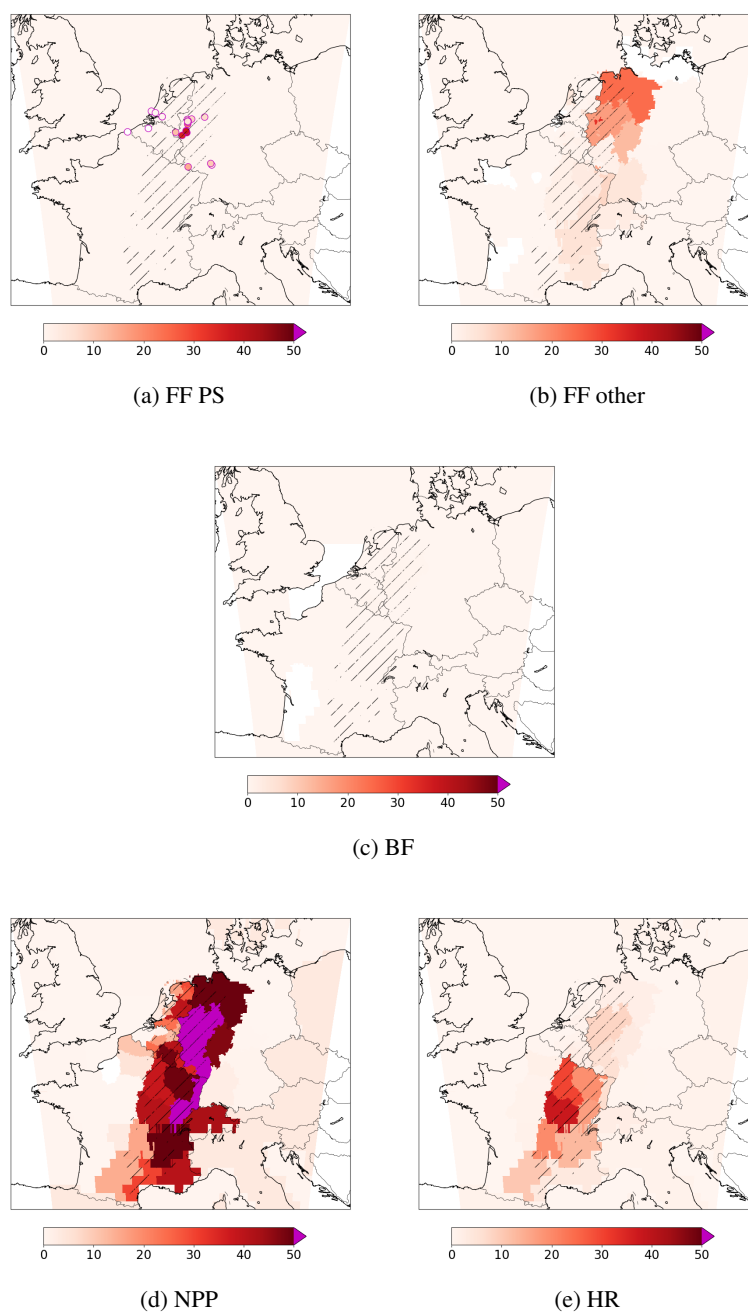

**Figure 7.** Uncertainty reduction in INV-Sat inversions: for morning budgets of large plants (a, FF\_PS, magenta circled dots), other FF (b) and BF (c, crop and wood) emissions (urban area and rest of the region budgets), Net Primary Production (d, NPP) and heterotrophic respiration (e, HR) (regional budgets). Stripes are indicative of the satellite field of view (see Fig. 5 for the full track).



### 3.1.2 Uncertainties in FF emissions

370 The uncertainty reductions for the 24-hour regional budgets of FF emissions (regional budgets aggregates emissions from urban areas, point source and the rest of the regions hereafter) range from 0 to 18% in the main area of interest (Fig. 9, a, Tab. 7). The URs are similar or rise in a range from 0 to 32% for the regional morning budget (Fig. 8, a and Tab. 7). Larger emission budgets generally lead to larger URs. However, for similar or lower emission budgets (median 8 vs.  $14 \text{ kTCO}_2 \cdot \text{area}^{-1} \cdot 24\text{h}^{-1}$  respectively), URs are significantly higher for emissions from urban areas than for the other regional emissions (max 18% vs. 10% respectively) since dense emissions areas generate atmospheric signatures with large amplitudes that are easier to filter from other signatures and from the observation noise than more extended but more diffuse emissions areas (Santaren et al., 2021). URs for the afternoon emissions entirely rely on the specification of 3-h temporal auto-correlation in the prior uncertainties in the emissions since these afternoon emissions are not directly seen by the satellite. Consequently, they are low for all types of sources. Figure 8(b) and Table 7 show URs for afternoon regional budgets ranging from 0 to 3%. Overall, the results show contrasting capacities for the monitoring of the FF emissions. The scores of URs result in various levels of precision on the emission estimates, with 8% to 30% posterior uncertainties in 24-hour and regional budgets of FF emissions in the main area of interest (Tab. 7). The lack of constraint outside the satellite FOV and during periods other than the morning confirms the need for complementary data to extrapolate the information derived from the satellite observations in space and time.

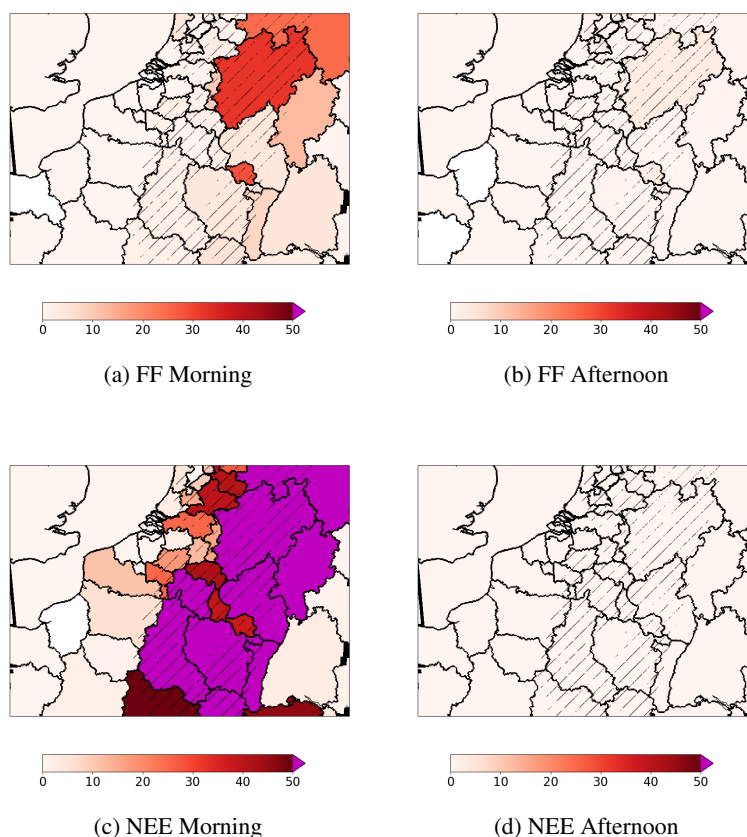

**Figure 8.** Uncertainty reduction in INV-Sat inversion: for morning (a, c) or afternoon (b, d) budgets of FF, biogenic fluxes (NEE). Stripes are indicative of the satellite field of view (see Fig. 5 for the full track).

### 385 3.1.3 Impact of NEE and BF emissions on FF emissions uncertainties

The UR for NEE is much larger than for the FF emissions (Fig. 8, b and c) while the UR for BF emissions is generally much smaller than for the FF emissions (Fig. 7). The problem of the attribution of inferred fluxes to FF emissions, NEE or BF emissions is investigated by conducting sensitivity tests in which the NEE or BF emissions are ignored, i.e. assuming no uncertainty in these fluxes (results when ignoring BF emissions are not shown in the figures and tables for the reasons given below). The INV-SAT experiment ignoring the NEE shows significantly larger URs for the FF regional 24-h budgets (Figure 9), up to 60% in the satellite FOV, for the FF regional morning budget (Table 7, without NEE). This increase of the URs yields posterior uncertainties in 24-h regional budgets which can reach values as low as 6.7% in the satellite FOV (Tab. 7).

390





### INV-Sat 24-h FF budget

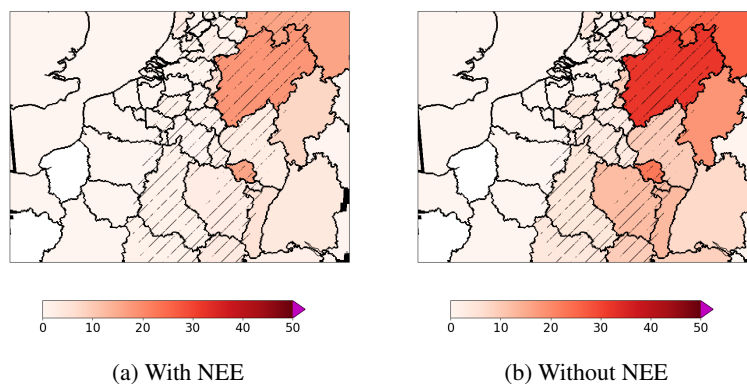

**Figure 9.** Uncertainty reduction in INV-Sat inversion with (a) and without (b) NEE, for 24-h budgets of FF emissions. Stripes are indicative of the satellite field of view (see Fig. 5 for the full track).

The sensitivity of INV-SAT experiment to the inclusion of BF emissions shows a very weak impact of BF emissions on the UR for FF emissions (not shown) even though the spatial distribution of these two types of emissions are strongly correlated. This is directly attributed to the weak amplitude of BF emissions compared to FF emissions. Typically, the posterior uncertainty in the FF emissions (6 to 30 % of the 24-h BF + FF emission budget) is much larger than the prior uncertainty in BF emissions (0 to 7% of the 24-h BF + FF emission budget).

### 3.2 Potential of the ground-based hourly CO<sub>2</sub> network

This section evaluates the impact of co-assimilating data from the ground-based hourly CO<sub>2</sub> network and the potential complementarity between the satellite and the CO<sub>2</sub> ground-based hourly observations. This evaluation is based on the analysis of INV-CO<sub>2</sub> and INV-SAT-CO<sub>2</sub> and comparisons with the results from INV-SAT.

#### 3.2.1 General results for the FF emissions

INV-CO<sub>2</sub> (Fig. 10) reveals the limited role of the horizontal atmospheric transport near the surface to propagate URs from regions with several measurement stations to other ones. URs of more than 4%, median at 12% and maximum at 13%, for 24-h budgets can be achieved in regions with 3 stations, like Ile-de-France (Reg. 1, 12%), and North Rhine-Westphalia (Reg.4, 13%) in the main area of interest (see also Fig. A1), or in regions with more stations outside this area like southeast England (10%) and Baden-Württemberg (26%) which have 5 stations. However, the UR can also be much lower in regions with many stations, e.g. for Lower-Saxony-and-Bremen which has 5 stations but a 4% UR. UR in regions with 1 or 2 stations range between 0% and 6%. The URs are generally below 1% for other regions. These URs reach lower or comparable values than in the INV-SAT experiment in the main area of interest (Fig.A1, Tab 7). However, outside the main area of interest, Baden-Württemberg reaches a higher value than the largest one with the INV-SAT experiment (Rhineland-Palatinate, Reg. 5, 18%).

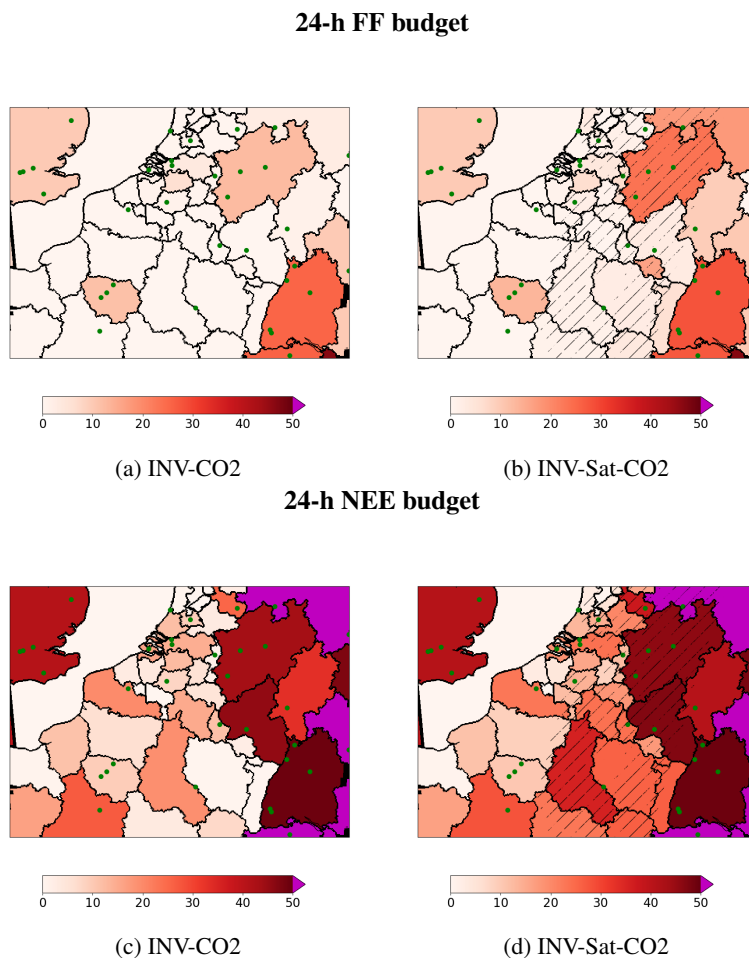

**Figure 10.** Uncertainty reduction in INV-CO<sub>2</sub> (a, c) and INV-Sat-CO<sub>2</sub> (b, d) inversions: for 24-h budgets of FF emissions and biogenic fluxes (NEE). Stripes are indicative of the satellite field of view. Green dots indicate the ground stations.

Of note is that the highest UR in the whole inversion domain (47% for 24-hour budgets and 56% for morning budgets) corresponds to large regions of the coarse resolution area of the transport model (not represented in Fig. 10). This result is primarily driven by the optimistic extrapolation of information from the sites to the coarse model grid cells and further to the whole extent of the control areas in which they stand. This optimistic bias from the inversion configuration actually results in representation and aggregation errors when conducting experiments with real data (Kaminski et al., 2001; Wang et al., 2017). It justifies and supports the use of the finer resolution control vector in the main area of interest, and the focus of our analysis on the 2-km resolution model subdomain. Unlike satellite data alone in INV-SAT, the ground-based CO<sub>2</sub> data constrains both afternoon and morning emission estimates, with URs of 4 to 18% and 4 to 15% respectively for morning and afternoon regional budgets of FF emissions in the regions with 3 or more stations (Fig. A3 and A4).



### 3.2.2 Co-assimilation of the satellite observations

Only one region of the 2-km resolution model subdomain with 3 stations is located in the satellite FOV: North Rhine-Westphalia. When comparing the URs for the 24-h regional budgets of FF emissions from INV-SAT-CO2 to that from INV-SAT and INV-CO2 (Tab. 8, Fig. A1) two significant changes can be seen. The first one is the decrease of 5% of the posterior uncertainty for this region, i.e. less than the UR for this region in INV-CO2 (12%). The second one is the increase of UR for the regions outside the satellite FOV with more than 3 ground-based stations from nearly 0% to values that are nearly the same as in INV-CO2. The URs at 24-h scale in INV-SAT-CO2 are smaller than the addition of URs in INV-SAT and INV-CO2 experiment (Fig. 11 and Fig. A1)

**Table 8.** CO<sub>2</sub> or/and <sup>14</sup>CO<sub>2</sub> ground network impact in addition to satellite observation:  $\Delta UR_{Test}^{Ref}$  on 24-h, Morning and Afternoon FF regional budgets, Maximal value on the AOI (column MAX), and value of the 2 most impacted area (Île-de-France and North Rhine Westphalia, column).

|           | Test            | Ref         | $\Delta UR_{Test}^{Ref} (\%)$ |      |               |                        |
|-----------|-----------------|-------------|-------------------------------|------|---------------|------------------------|
|           |                 |             | MAX                           | MEAN | Île-de-France | North Rhine Westphalia |
| Daily     | INV-SAT-CO2     | INV-SAT     | 13,3                          | 1,6  | 13,3          | 5,2                    |
|           | INV-SAT-14C     | INV-SAT     | 14,6                          | 2,5  | 14,6          | 12,7                   |
|           | INV-SAT-CO2-14C | INV-SAT     | 20,8                          | 3,3  | 20,8          | 14,5                   |
|           | INV-SAT-CO2-14C | INV-SAT-CO2 | 9,3                           | 1,8  | 7,5           | 9,3                    |
| Morning   | INV-SAT-CO2     | INV-SAT     | 12,7                          | 1,7  | 12,7          | 5,4                    |
|           | INV-SAT-14C     | INV-SAT     | 16,5                          | 2,7  | 11,9          | 16,5                   |
|           | INV-SAT-CO2-14C | INV-SAT     | 19,2                          | 3,7  | 19,2          | 18,4                   |
|           | INV-SAT-CO2-14C | INV-SAT-CO2 | 13                            | 2,1  | 6,5           | 13                     |
| Afternoon | INV-SAT-CO2     | INV-SAT     | 15,8                          | 1,2  | 15,8          | 6,4                    |
|           | INV-SAT-14C     | INV-SAT     | 10,8                          | 1    | 10,8          | 5,6                    |
|           | INV-SAT-CO2-14C | INV-SAT     | 20,5                          | 1,8  | 20,5          | 10                     |
|           | INV-SAT-CO2-14C | INV-SAT-CO2 | 4,7                           | 0,5  | 4,7           | 3,6                    |

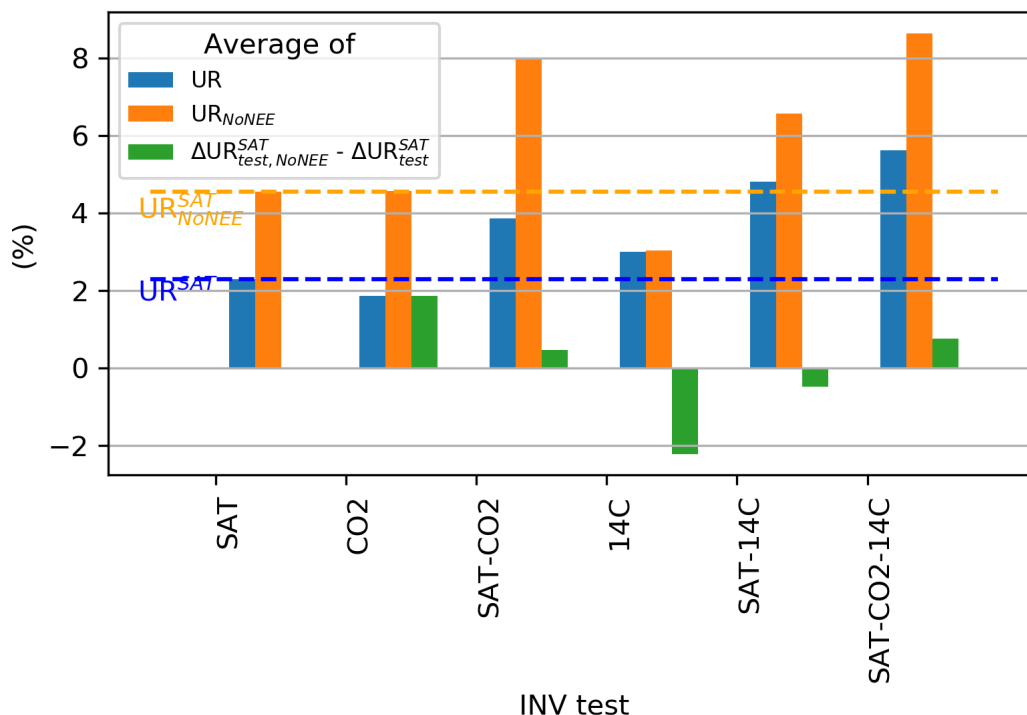

**Figure 11.** Average on the main area of interest of the UR on 24-h FF regional budgets in a set of inversion configurations, with (blue) and without (orange) NEE and average of the difference between  $\Delta UR_{test}^{SAT}$  with and without NEE (green). Negative values highlight an increase of the additional observation network potential when NEE is taken into account. Positive values highlight a decrease of the additional observation network potential when NEE is taken into account. High absolute values highlight strong NEE impact.

The ground-based CO<sub>2</sub> data constrains both afternoon and morning emission estimates, with URs of 3 to 30% and of 1 to 27% respectively for morning and afternoon regional budgets of FF emissions in the regions with three or more stations (data not shown). The comparison between results for afternoon budgets of the FF emissions from INV-SAT-CO2 and INV-SAT shows again, in INV-SAT-CO2, an increased UR that is smaller than the sum of the URs obtained in INV-SAT and INV-CO2 (Tab. 7). Combining the satellite data with the afternoon data from the ground network does not increase the ability to extrapolate the spatially widely spread information from these satellite data to the afternoon.

### 3.2.3 Impact of NEE and BF emissions on FF emissions uncertainty

INV-CO2 and the results of INV-SAT-CO2 outside the FOV of the satellite show different situations regarding the comparison between UR for NEE and FF emissions (Fig. 10). In regions with large cities and industrial plants (like the Paris area and Baden-Württemberg), the URs for NEE are smaller than that for FF as in INV-SAT. However, in other regions, the signal at the surface stations is dominated by the signature of the biogenic fluxes and URs for NEE are larger than that for FF emissions.



440 Due to the relatively weak signal from BF emissions, the URs for these emissions are much smaller than that for FF emissions (less than 3%, less than 0.1% on average) in INV-CO2.

The impact of the attribution problem when using the surface CO<sub>2</sub> network is quantified, here again, by conducting sensitivity tests in which NEE is ignored (Fig. 11 and Tab. 7). As the surface network has many stations mostly sensitive to the NEE signal, it is expected to support the distinction between NEE and FF emissions in the inversion, even if the stations measure  
 445 CO<sub>2</sub> only. In inversions INV-CO2, the UR for FF emissions is higher when ignoring the NEE, reaching a range between 18 and 46% for 24-h budgets in the regions with more than 3 stations. However, the comparison between results from INV-SAT-CO2 and INV-SAT when ignoring these fluxes hardly demonstrates a potential of the surface CO<sub>2</sub> network to reduce the problem of attribution between FF emissions and other fluxes (Fig. 11). Figures 11 show  $\Delta UR_{SAT-CO_2, NoNEE}^{SAT}$  larger than  $\Delta UR_{SAT-CO_2}^{SAT}$  on average, i.e adding the CO<sub>2</sub> network when ignoring the NEE yields a larger increase of the UR than when  
 450 accounting for NEE. This is linked to the smaller UR associated with CO<sub>2</sub> data when accounting for NEE. There is a lack of indirect feedback on the UR for FF emissions from the lowering of uncertainties in NEE when complementing the satellite data with CO<sub>2</sub> data. However the results for each area taken independently show somewhat contrasting results (Fig. 12) with  $\Delta UR_{SAT-CO_2, NoNEE}^{SAT}$  lower than  $\Delta UR_{SAT-CO_2}^{SAT}$  in some regions.

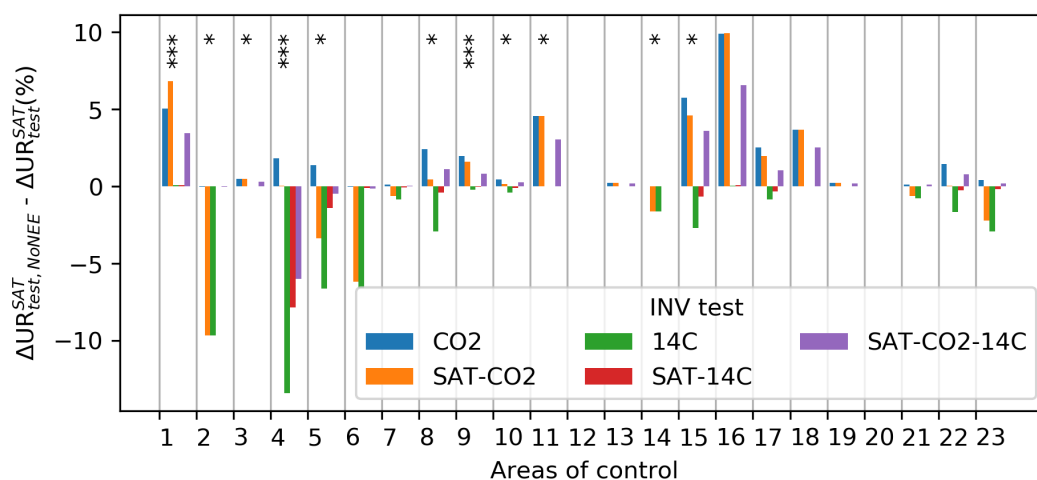

**Figure 12.** Impact of the NEE on the ground network capability on the top of the satellite observation for each area of control in the main area of interest: differences between  $\Delta UR_{test}^{SAT}$  on 24-h FF regional budgets, with and without NEE. Negative values highlight an increase of the additional observation network potential when NEE is taken into account. Positive values highlight a decrease of the additional observation network potential when NEE is taken into account. High absolute values highlight strong NEE impact. The number of stars indicates the number of stations in each controlled area. The areas are listed in Appendix 1.

Regarding BF emissions, the results are similar to that described in section 3.1, i.e a very weak impact of BF emissions  
 455 on the UR for FF emissions. With INV-SAT-CO2 the posterior uncertainties in FF emissions (7 to 30% of the 24-h BF + FF emission budget) are much larger than the prior uncertainty in BF emissions (0 to 7% of the 24-h BF + FF emission budget).



### 3.3 Potential of the ground-based $^{14}\text{CO}_2$ network

This section evaluates the impact of co-assimilating data from the ground-based 7-h-average  $^{14}\text{CO}_2$  network and the potential complementarities between the satellite and hourly- $\text{CO}_2$ , 7-h-average  $^{14}\text{CO}_2$  ground-based observations. This evaluation is based on the analysis of INV-14C and INV-SAT-CO2-14C and comparisons with the results from INV-CO2 and INV-SAT-CO2.

#### 3.3.1 General results for the FF emissions

The spatial distribution of the regional URs for 24-h, morning or afternoon budgets when using surface 7-h-average  $^{14}\text{CO}_2$  data alone is similar to that when using hourly- $\text{CO}_2$  surface data only (Fig. 13). These URs are very low for regions with less than 2 stations ( $<7\%$ ) and range between 12 to 34% for the morning budgets and between 4 to 14% for the afternoon budgets for regions with more than 3 sites. The URs on daily and morning budgets are larger in INV-14C (Tab. 7, Fig. A2 and A5), i.e. when using the sampling of  $^{14}\text{CO}_2$  representative of 7-h-averages of the concentrations, than in INV-CO2 (Tab. 7, Fig. A1 and A3), when using 7 hourly  $\text{CO}_2$  data at each site. However, the URs on afternoon budgets are smaller in INV-14C than in INV-CO2. In most regions these differences remain relatively small except in Region 4, North Rhine Westphalia, with up to 15 percentage points difference from the morning budget. The higher potential of  $^{14}\text{CO}_2$  data (7-hour averages) than hourly  $\text{CO}_2$  data to filter the signal from FF emissions, if both were measured at the same temporal resolution, is balanced by the finer temporal resolution of the hourly  $\text{CO}_2$  continuous measurements. The hourly  $\text{CO}_2$  data's finer temporal resolution helps capture the high frequency patterns of the signal from FF emissions.

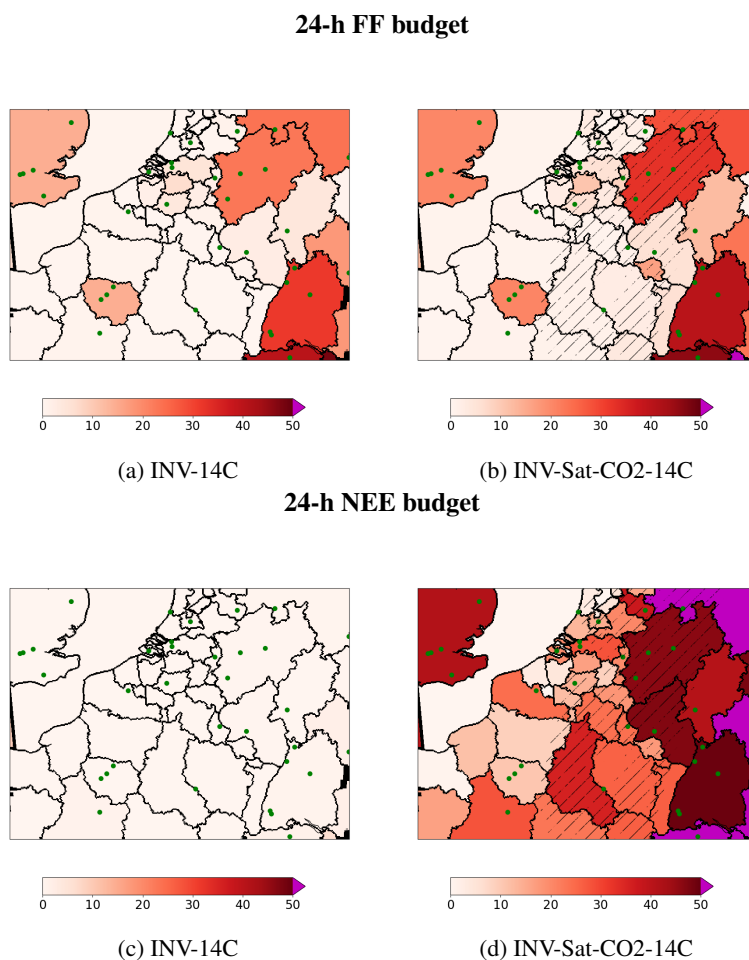

**Figure 13.** Uncertainty reduction in INV-14C (a) and INV-Sat-CO2-14C (c) inversions: for 24-h budgets of FF emissions (a, b, c) and biogenic fluxes (NEE, d, e, f). Stripes are indicative of the satellite field of view (see Fig. 5 for the full track). Green dots indicate the ground stations.

### 3.3.2 Co-assimilation of the satellite and surface hourly-CO<sub>2</sub> observations

475 The fact that the URs when combining two networks is smaller than the sum of the URs when using each of these networks  
shown when comparing INV-SAT, INV-CO<sub>2</sub> and INV-SAT-CO<sub>2</sub>, also applies when adding the surface network i.e. when com-  
paring e.g. INV-SAT-14C to INV-SAT and INV-14C or INV-SAT-CO<sub>2</sub>-14C to INV-SAT-CO<sub>2</sub> and INV-14C. The combination  
of 7-h-average <sup>14</sup>CO<sub>2</sub> data with other types of data does not lead to further synergies of the advantages for each network: the  
spatial extent of the satellite observation, the temporal coverage of the ground-based networks, the temporal resolution of the  
480 hourly-CO<sub>2</sub> surface network, and the higher sensitivity to FF emissions of the 7-h-average <sup>14</sup>CO<sub>2</sub> network. In North Rhine-  
Westphalia, where the configuration is favourable, with 3 stations in the satellite FOV, the UR for the daily budget increases  
from 18% with INV-SAT to 33% with INV-SAT-CO<sub>2</sub>-14C (Fig. 13, Reg. 4). This configuration leads to 6.6% posterior un-



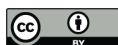

certainty. In Île-de-France (Reg. 1) outside the satellite FOV and with 3 stations, the UR reaches 21% in INV-SAT-CO2-14C, reaching 18% posterior uncertainty. In Saarland (Reg. 6), in the satellite FOV and without stations, the UR remains similar in  
485 INV-SAT-CO2-14C as in INV-SAT, 17%, corresponding to 15% posterior uncertainty.

### 3.3.3 Impact of $^{14}\text{CO}_2$ sources: nuclear emissions, NEE and BF emissions

The impact of nuclear emissions in the inversions assimilating  $^{14}\text{CO}_2$  data is analysed by conducting experiments where these emissions are ignored. The comparison of INV-14C experiments with and without nuclear emissions shows a decrease of the URs, in the range of 0-1.7 percentage points (Fig. A7, a), when these  $^{14}\text{C}$  emissions are taken into account. In the main area of  
490 interest, the most impacted areas are the Zeeland, Brabant/Bruxelles, Anvers and Flanders regions where the stations are close to nuclear power plants (Fig. A7, b). Outside the main area of interest, Baden-Wurttemberg is also strongly impacted, with up to 9% points difference.

Concerning the impact of NEE, in INV-14C, the URs for FF emissions in the regions with more than 3 stations are higher when ignoring the NEE, reaching a range between 15 and 33% for 24-h budgets. The comparison of the experiments INV-14C  
495 with and without NEE shows a much smaller impact of NEE on the URs for FF emissions than in experiments INV-CO2 or INV-SAT, which confirms the much smaller sensitivity of  $^{14}\text{CO}_2$  data to NEE than  $\text{CO}_2$  data. An interesting consequence is that, on average,  $\Delta\text{UR}_{14\text{C}}^{\text{SAT}}$ ,  $\Delta\text{UR}_{\text{SAT}-14\text{C}}^{\text{SAT}}$  (Fig. 11) or  $\Delta\text{UR}_{\text{SAT}-\text{CO}_2-14\text{C}}^{\text{SAT}-\text{CO}_2}$  (not shown) are slightly larger when accounting for the NEE than when ignoring them. The potential of the  $^{14}\text{CO}_2$  network to complement the satellite observation is higher when NEE is accounted for, while section 3.2 showed more contrasting results for the surface  $\text{CO}_2$  network. This increase of  
500 the impact of the  $^{14}\text{CO}_2$  network when accounting for NEE is however relatively small, reaching its maximum in the region North Rhine-Westphalia, which has 3 stations, and where the posterior uncertainty decrease for the 24-h regional budgets of FF emissions from INV-SAT to INV-SAT-14C is 15%.

## 4 Discussion and Conclusions

### 4.1 Configuration of the inversion

505 Several caveats should be raised for the interpretation of these results. Part of the lack of amplification of the impact from the different observation subsystems when combining them could be due to our set-up of the prior uncertainties in which we ignore spatial correlations and assume that the temporal correlations are relatively low. These assumptions are conservative and, we believe, safer, in a context where the correlations of uncertainties in current inventories are still poorly characterized and, since they are probably highly complex and far from isotropic, homogeneous, decreasing with distance or time. For  
510 instance, distant plants or cities can have more similar processes than ~~close ones~~, and the emissions and their underlying processes can vary rapidly depending on the time, weather, or socio-economic drivers. Inversions assuming large temporal and spatial correlations in the prior uncertainties in inventories would indicate a stronger ability to extrapolate the information from atmospheric data but would be overly optimistic.



Our model of the uncertainty in the atmospheric transport is relatively simple here: a Gaussian distribution without any  
515 spatial and temporal correlations, as traditionally done in atmospheric inversions (Santaren et al., 2021). Complex modelling  
errors could actually shift or modify the patterns of the atmospheric signature of the FF emissions, which could increase the  
weight of the attribution problem, and thus the potential of the combination between satellite and surface data. However, very  
dense surface networks would be needed to support the identification and adjustment of transport errors.

The results demonstrate the need for a complex simulation of the CO<sub>2</sub> and <sup>14</sup>CO<sub>2</sub> transport, taking into account the diversity  
520 of <sup>14</sup>CO<sub>2</sub> sources and sinks, and more realistic than the common simplification which consists of representing only the dilution  
of radiocarbon-free FF CO<sub>2</sub> emissions. This and an inversion system at high resolution is more suitable for assessing the real  
ability to extrapolate information from the <sup>14</sup>CO<sub>2</sub> atmospheric data. However, given its high spatial and temporal resolution,  
the analytical inversion framework used here can hardly be run over several days, because the size of the matrices to be inverted  
would become too large. Therefore, inversions have been run for one day only, on July 1 2015 i.e. for very specific atmospheric  
525 conditions and biogenic fluxes. In summer the biogenic fluxes are relatively high. Tests over different days, e.g. in winter, could  
bring a more precise characterization of the complementarity of in situ networks with satellite data, but the primary focus of  
this study was to investigate the problem of the separation between the biogenic fluxes and FF emissions. By limiting the  
inversion window to a single day, we avoid analyzing to which extent the temporal correlations of the uncertainties in the FF  
CO<sub>2</sub> emission inventories allow for cross-referencing the information of data from different days. This assessment should rely  
530 on a strong knowledge on the structures of uncertainties in the FF emissions, which is still incomplete, as illustrated above,  
even though efforts have been conducted to improve this issue (Wang et al., 2020; Super et al., 2020).

Finally our study tested a surface network roughly corresponding to the extension of a continental network like ICOS for  
the monitoring of regional FF emission budgets. The deployment of networks dedicated to specific cities with stations around  
and within the urban areas (Wu et al., 2016) would correspond to a different strategy and could result in different conclusions  
535 for the monitoring of city emissions.

## 4.2 Insights from the results

The results presented here raise contrasting conclusions regarding the potential of the combination between the satellite obser-  
vation and the surface networks. The satellite observation, as a stand-alone system, can yield estimates of the regional budgets  
of FF emissions in the morning corresponding to its days of overpass with uncertainties down to 10% (prior 15%, UR 32%) in  
540 its FOV. However, it does not provide direct information on emissions during the afternoon or during the night, and it hardly  
provides information on plants, cities and regions outside its FOV. Furthermore, previous publications (Broquet et al., 2018;  
Wang et al., 2020; Lespinas et al., 2020; Kuhlmann et al., 2019) have shown that, even with a CO2M constellation of three or  
more satellites, the number of overpasses producing local images with low cloud cover is limited each year. The data gaps are  
not random over time and hamper the estimation of annual budgets or their anomalies, as illustrated in the case of the "Great  
545 Lockdown" (Chevallier et al., 2020). The need for complementary sources of information to derive daily to annual budgets is  
thus critical.



The problem of attributing the inferred CO<sub>2</sub> fluxes to specific emission and absorption types appears to be nearly secondary compared to that of the satellite observation precision but our results confirm that there is a significant impact of the uncertainty in the NEE for the estimate of FF emissions. The uncertainty in BF emissions does not appear to have a large impact on the estimate of FF emissions but this is related to the fact that the posterior uncertainty in FF emissions remains larger than the prior uncertainty in BF emissions i.e. to the relatively low level of BF emissions compared to the typical uncertainties in FF emissions at regional to local scales. If the goal is to achieve higher precision estimates of the FF emissions than those obtained with the present configuration, for example with higher precision spaceborne instruments, and if the share of BF emissions increases in the future, the uncertainty in BF emissions would probably become a major problem due to the strong correlation between the spatial distributions of FF and BF emissions. The problem of attribution to NEE fluxes would also increase with this goal of higher precision estimates of the FF emissions in the future.

Surface CO<sub>2</sub>/<sup>14</sup>CO<sub>2</sub> networks can help further decrease the uncertainty in the FF emissions estimates when combined with satellite observations. In North Rhine-Westphalia, the addition of CO<sub>2</sub> and <sup>14</sup>CO<sub>2</sub> stations decreases the posterior uncertainty in daily regional emissions from 8% with the satellite alone to 6.6%. However, relatively dense networks close to highly emitting areas are needed to support such a decrease. The isolated stations far from the urban areas do not provide a direct strong constraint for the estimate of the FF emissions, nor a significant indirect constraint for this estimate by solving for the attribution problem. Our results suggest that surface CO<sub>2</sub> and/or <sup>14</sup>CO<sub>2</sub> measurements in support of the FF emission monitoring should be targeting FF emission areas directly rather than the surrounding NEE. Both hourly CO<sub>2</sub> and daily <sup>14</sup>CO<sub>2</sub> data can provide useful information on the FF emissions, the former catching the signature of these emissions at high frequency and the latter being much less sensitive to the uncertainty in the NEE.

Overall, the results illustrate a decrease of the potential of each observation subsystem rather than an amplification of these potentials when combining them together into a large observation system with satellite and surface data. This is the natural consequence of the asymptotic convergence of the precision of inversions towards some low value when adding observations. To our experiments, crossing the spatial extent of the satellite observation, the temporal coverage of the ground-based networks, the temporal resolution of the CO<sub>2</sub> surface network, and the higher sensitivity to FF emissions of the <sup>14</sup>CO<sub>2</sub> network does not lead to the expected synergy with wide spatio-temporal coverage of the FF emissions at high resolution. There is a lack of new extrapolation of information from the combination of observation subsystems. This may be due to the specificities of the attribution and extrapolation problems in our inversion case.

Therefore, these results support the deployment of very dense CO<sub>2</sub>/<sup>14</sup>CO<sub>2</sub> surface networks to support the satellite observation, with at least three sites per European administrative region. The large-scale deployment of such dense networks is probably unaffordable in the coming decade, but some regions are now equipped with many stations and in some locations, the complementarity between satellite and surface networks could thus be demonstrated. Frequent (up to daily) samplings of <sup>14</sup>CO<sub>2</sub> would be needed to ensure <sup>14</sup>CO<sub>2</sub> data can bring information on FF emissions more precise than that of hourly CO<sub>2</sub> measurements.



580 *Author contributions.* 1) writing process: mainly EP, GB, FC with inputs from all co authors, 2) System and experiment design: EP, GB, FC, YW, PC, DS, 3) Implementation: EP, 4) support in development and use of data: AB, IP, FMB, JM 5) Analysis: mainly EP, GB, FC with feedbacks from all co authors

*Competing interests.* The authors declare that they have no conflict of interest.

*Acknowledgements.* This study has been funded by the European Union's Horizon 2020 research and innovation programme under grant agreements No 776186 (CO<sub>2</sub> Human Emissions project) and 958927 (Prototype system for a Copernicus CO<sub>2</sub> service). This work was granted access to the HPC resources of TGCC under the allocations A0090102201 made by GENCI. We wish to thank Michael Buchwitz and Maximilian Reuter (IUP-UB), as well as Yasjka Meijer and Armin Loescher from from ESA for providing the CO<sub>2</sub>M XCO<sub>2</sub> L2 simulations, which were generated in the study funded by the European Space Agency under Contract No 4000120184. We also thank all the CHE partners and particularly Hugo Denier van der Gon (TNO) for providing the anthropogenic CO<sub>2</sub> inventories, Julia Marshall (MPI-BGC) for providing the biogenic CO<sub>2</sub> fluxes and Tonatiuh Nuñez Ramirez (MPI-BGC) for designing the ground-based network scenario, in the context of WP4 of CHE.

585  
590



## References

- Agusti-Panareda, A.: The CHE Tier1 Global Nature Run, Tech. rep., CO2 Human Emissions, H2020 European Project, <https://www.che-project.eu/sites/default/files/2018-07/CHE-D2.2-V1-0.pdf>, 2018.
- 595 Basu, S., Miller, J. B., and Lehman, S.: Separation of biospheric and fossil fuel fluxes of CO<sub>2</sub> by atmospheric inversion of CO<sub>2</sub> and 14CO<sub>2</sub> measurements: Observation System Simulations, *Atmos. Chem. Phys.*, 16, 5665–5683, <https://doi.org/10.5194/acp-16-5665-2016>, number: 9 Reporter: *Atmos. Chem. Phys.*, 2016.
- Basu, S., Baker, D. F., Chevallier, F., Patra, P. K., Liu, J., and Miller, J. B.: The impact of transport model differences on CO<sub>2</sub> surface flux estimates from OCO-2 retrievals of column average CO<sub>2</sub>, *Atmospheric Chemistry and Physics*, 18, 7189–7215, [https://doi.org/10.5194/acp-](https://doi.org/10.5194/acp-18-7189-2018)  
600 18-7189-2018, 2018.
- Berchet, A., Sollum, E., Thompson, R. L., Pison, I., Thanwerdas, J., Broquet, G., Chevallier, F., Aalto, T., Berchet, A., Bergamaschi, P., Brunner, D., Engelen, R., Fortems-Cheiney, A., Gerbig, C., Groot Zwaafink, C. D., Haussaire, J.-M., Henne, S., Houweling, S., Karstens, U., Kutsch, W. L., Luijkx, I. T., Monteil, G., Palmer, P. I., van Peet, J. C. A., Peters, W., Peylin, P., Potier, E., Rödenbeck, C., Saunio, M., Scholze, M., Tsuruta, A., and Zhao, Y.: The Community Inversion Framework v1.0: a unified system for atmospheric inversion studies, *Geoscientific Model Development*, 14, 5331–5354, <https://doi.org/10.5194/gmd-14-5331-2021>, 2021.
- 605 Broquet, G., Chevallier, F., Rayner, P., Aulagnier, C., Pison, I., Ramonet, M., Schmidt, M., Vermeulen, A. T., and Ciais, P.: A European summertime CO<sub>2</sub> biogenic flux inversion at mesoscale from continuous in situ mixing ratio measurements, *Journal of Geophysical Research: Atmospheres*, 116, <https://doi.org/10.1029/2011JD016202>, 2011.
- Broquet, G., Bréon, F.-M., Renault, E., Buchwitz, M., Reuter, M., Bovensmann, H., Chevallier, F., Wu, L., and Ciais, P.: The potential of  
610 satellite spectro-imagery for monitoring CO<sub>2</sub> emissions from large cities, *Atmos. Meas. Tech.*, 11, 681–708, <https://doi.org/10.5194/amt-11-681-2018>, number: 2 Reporter: *Atmos. Meas. Tech.*, 2018.
- Chevallier, F., Zheng, B., Broquet, G., Ciais, P., Liu, Z., Davis, S. J., Deng, Z., Wang, Y., Bréon, F.-M., and O’Dell, C. W.: Local Anomalies in the Column-Averaged Dry Air Mole Fractions of Carbon Dioxide Across the Globe During the First Months of the Coronavirus Recession, *Geophysical Research Letters*, 47, e2020GL090244, <https://doi.org/10.1029/2020GL090244>, 2020.
- 615 Ciais, P., Crisp, D., Denier van der Gon, H. A. C., Engelen, R., Heimann, M., Janssens-Maenhout, G., and Rayner, P., a. S. M.: Towards a European Operational Observing System to Monitor Fossil CO<sub>2</sub> emissions, Tech. rep., European Commission Directorate-General for Internal Market, Industry, Entrepreneurship and SMEs Directorate I – Space Policy, Copernicus and Defence, Brussels, Belgium, <https://doi.org/10.2788/52148>, 2015.
- Ciais, P., Wang, Y., Andrew, R., Bréon, F. M., Chevallier, F., Broquet, G., Nabuurs, G. J., Peters, G., McGrath, M., Meng, W., Zheng, B., and  
620 Tao, S.: Biofuel burning and human respiration bias on satellite estimates of fossil fuel CO<sub>2</sub> emissions, *Environmental Research Letters*, 15, 074036, <https://doi.org/10.1088/1748-9326/ab7835>, 2020.
- Degens, E. T.: *Biogeochemistry of Stable Carbon Isotopes*, pp. 304–329, Springer Berlin Heidelberg, Berlin, Heidelberg, [https://doi.org/10.1007/978-3-642-87734-6\\_14](https://doi.org/10.1007/978-3-642-87734-6_14), 1969.
- Denier van der Gon, H. A. C., Kuenen, J. J. P., Janssens-Maenhout, G., Döring, U., Jonkers, S., and Visschedijk, A.: TNO\_CAMS high  
625 resolution European emission inventory 2000–2014 for anthropogenic CO<sub>2</sub> and future years following two different pathways, *Earth System Science Data Discussions*, pp. 1–30, <https://doi.org/10.5194/essd-2017-124>, publisher: Copernicus GmbH, 2017.
- ESA: ESA Annual Report 2015, Tech. rep., ESA, 2015.



- Farquhar, G. D., Ehleringer, J. R., and Hubick, K. T.: Carbon Isotope Discrimination and Photosynthesis, *Annual Review of Plant Physiology and Plant Molecular Biology*, 40, 503–537, <https://doi.org/10.1146/annurev.pp.40.060189.002443>, 1989.
- Fortems-Cheiney, A., Pison, I., Broquet, G., Dufour, G., Berchet, A., Potier, E., Coman, A., Siour, G., and Costantino, L.: Variational regional inverse modeling of reactive species emissions with PYVAR-CHIMERE-v2019, *Geoscientific Model Development*, 14, 2939–2957, <https://doi.org/10.5194/gmd-14-2939-2021>, 2021.
- Graven, H. and Gruber, N.: Continental-scale enrichment of atmospheric  $^{14}\text{CO}_2$  from the nuclear power industry: Potential impact on the estimation of fossil fuel-derived  $\text{CO}_2$ , *Atmospheric Chemistry and Physics Discussions*, 11, 14 583–14 605, <https://doi.org/10.5194/acpd-11-14583-2011>, reporter: *Atmospheric Chemistry and Physics Discussions*, 2011.
- Graven, H., Allison, C. E., Etheridge, D. M., Hammer, S., Keeling, R. F., Levin, I., Meijer, H. A. J., Rubino, M., Tans, P. P., Trudinger, C. M., Vaughn, B. H., and White, J. W. C.: Compiled records of carbon isotopes in atmospheric  $\text{CO}_2$ ; for historical simulations in CMIP6, *Geoscientific Model Development*, 10, 4405–4417, <https://doi.org/10.5194/gmd-10-4405-2017>, number: 12 Reporter: *Geoscientific Model Development*, 2017.
- Guimberteau, M., Zhu, D., Maignan, F., Huang, Y., Yue, C., Dantec-Nédélec, S., Otlé, C., Jornet-Puig, A., Bastos, A., Laurent, P., Goll, D., Bowring, S., Chang, J., Guenet, B., Tifafi, M., Peng, S., Krinner, G., Ducharne, A., Wang, F., Wang, T., Wang, X., Wang, Y., Yin, Z., Lauerwald, R., Joetzjer, E., Qiu, C., Kim, H., and Ciais, P.: ORCHIDEE-MICT (v8.4.1), a land surface model for the high latitudes: model description and validation, *Geoscientific Model Development*, 11, 121–163, <https://doi.org/10.5194/gmd-11-121-2018>, publisher: Copernicus GmbH, 2018.
- Hammer, S. and Levin, I.: Monthly mean atmospheric  $\text{D}^{14}\text{CO}_2$  at Jungfraujoch and Schauinsland from 1986 to 2016, <https://doi.org/10.11588/data/10100>, 2017.
- IPCC: 2019 Refinement to the 2006 IPCC Guidelines for National Greenhouse Gas Inventories, Tech. rep., Calvo Buendia, E., Tanabe, K., Kranjc, A., Baasansuren, J., Fukuda, M., Ngarize, S., Osako, A., Pyrozhenko, Y., Shermanau, P. and Federici, S. (eds), 2019.
- Jung, M., Henkel, K., Herold, M., and Churkina, G.: Exploiting synergies of global land cover products for carbon cycle modeling, *Remote Sensing of Environment*, 101, 534–553, <https://doi.org/https://doi.org/10.1016/j.rse.2006.01.020>, 2006.
- Kaminski, T., Rayner, P. J., Heimann, M., and Enting, I. G.: On aggregation errors in atmospheric transport inversions, *Journal of Geophysical Research: Atmospheres*, 106, 4703–4715, <https://doi.org/https://doi.org/10.1029/2000JD900581>, \_eprint: <https://agupubs.onlinelibrary.wiley.com/doi/pdf/10.1029/2000JD900581>, 2001.
- Kuhlmann, G., Broquet, G., Marshall, J., Clément, V., Löscher, A., Meijer, Y., and Brunner, D.: Detectability of  $\text{CO}_2$  emission plumes of cities and power plants with the Copernicus Anthropogenic  $\text{CO}_2$  Monitoring (CO2M) mission, *Atmospheric Measurement Techniques*, 12, 6695–6719, <https://doi.org/https://doi.org/10.5194/amt-12-6695-2019>, publisher: Copernicus GmbH, 2019.
- Lespinas, F., Wang, Y., Broquet, G., Bréon, F.-M., Buchwitz, M., Reuter, M., Meijer, Y., Loescher, A., Janssens-Maenhout, G., Zheng, B., and Ciais, P.: The potential of a constellation of low earth orbit satellite imagers to monitor worldwide fossil fuel  $\text{CO}_2$  emissions from large cities and point sources, *Carbon Balance and Management*, 15, 18, <https://doi.org/10.1186/s13021-020-00153-4>, 2020.
- Levin, I., Kromer, B., Schmidt, M., and Sartorius, H.: A novel approach for independent budgeting of fossil fuel  $\text{CO}_2$  over Europe by  $^{14}\text{CO}_2$  observations, *Geophysical Research Letters*, 30, <https://doi.org/10.1029/2003GL018477>, number: 23 Reporter: *Geophysical Research Letters*, 2003.
- López, R., Guillén, J., Fiore, G., M'Barek, R., Tamosiunas, S., Camia, A., Banja, M., Cazzaniga, N. E., Gurría, P., García Condado, S., Jonsson, R., and Ronzon, T.: Biomass flows in the European Union: the Sankey biomass diagram – towards a cross set integration of biomass, *Publications Office of the European Union*, <https://data.europa.eu/doi/10.2760/352412>, 2017.



- Mahadevan, P., Wofsy, S. C., Matross, D. M., Xiao, X., Dunn, A. L., Lin, J. C., Gerbig, C., Munger, J. W., Chow, V. Y., and Gottlieb, E. W.: A satellite-based biosphere parameterization for net ecosystem CO<sub>2</sub> exchange: Vegetation Photosynthesis and Respiration Model (VPRM), *Global Biogeochemical Cycles*, 22, <https://doi.org/10.1029/2006GB002735>, number: 2 Reporter: *Global Biogeochemical Cycles*, 2008.
- 670 Marshall, J., Nuñez Ramirez, T., and partners, W. C.: Attribution Problem Configurations, Tech. rep., CO<sub>2</sub> Human Emissions, H2020 European Project, <https://www.che-project.eu/sites/default/files/2020-01/CHE-D4-3-V4-1.pdf>, 2019.
- Menut, L., Bessagnet, B., Khvorostyanov, D., Beekmann, M., Blond, N., Colette, A., Coll, I., Curci, G., Foret, G., Hodzic, A., Mailler, S., Meleux, F., Monge, J.-L., Pison, I., Siour, G., Turquety, S., Valari, M., Vautard, R., and Vivanco, M. G.: CHIMERE 2013: a model for regional atmospheric composition modelling, *Geoscientific Model Development*, 6, 981–1028, <https://doi.org/10.5194/gmd-6-981-2013>,  
675 2013.
- Naipal, V., Ciais, P., Wang, Y., Lauerwald, R., Guenet, B., and Van Oost, K.: Global soil organic carbon removal by water erosion under climate change and land use change during AD 1850–2005, *Biogeosciences*, 15, 4459–4480, <https://doi.org/10.5194/bg-15-4459-2018>, 2018.
- Pillai, D., Buchwitz, M., Gerbig, C., Koch, T., Reuter, M., Bovensmann, H., Marshall, J., and Burrows, J. P.: Tracking city CO<sub>2</sub> emissions  
680 from space using a high-resolution inverse modelling approach: a case study for Berlin, Germany, *Atmospheric Chemistry and Physics*, 16, 9591–9610, <https://doi.org/10.5194/acp-16-9591-2016>, 2016.
- Pinty, B., Janssens-Maenhout, G., Dowell, M., Zunker, H., Brunhes, T., Ciais, P., Dee, D., Denier van der Gon, H. A. C., Dolman, H., Drinkwater, M., Engelen, R., Heimann, M., Holmlund, K., Husband, R., Kentarchos, A., Meyer, A., Palmer, P., and Scholze, M.: An operational anthropogenic CO<sub>2</sub> emissions monitoring and verification support capacity. Baseline requirements, model components and  
685 functional architecture, Tech. rep., European Commission Joint Research Centre, Ispra, Italy, <https://doi.org/10.2760/08644>, 2017.
- Portmann, F. T., Siebert, S., and Döll, P.: MIRCA2000—Global monthly irrigated and rainfed crop areas around the year 2000: A new high-resolution data set for agricultural and hydrological modeling, *Global Biogeochemical Cycles*, 24, <https://doi.org/https://doi.org/10.1029/2008GB003435>, 2010.
- Santaren, D., Broquet, G., Bréon, F.-M., Chevallier, F., Siméoni, D., Zheng, B., and Ciais, P.: A local- to national-scale inverse modeling system to assess the potential of spaceborne CO<sub>2</sub> measurements for the monitoring of anthropogenic emissions, *Atmospheric Measurement  
690 Techniques*, 14, 403–433, <https://doi.org/10.5194/amt-14-403-2021>, 2021.
- Schwandner, F. M., Gunson, M. R., Miller, C. E., Carn, S. A., Eldering, A., Krings, T., Verhulst, K. R., Schimel, D. S., Nguyen, H. M., Crisp, D., O’Dell, C. W., Osterman, G. B., Iraci, L. T., and Podolske, J. R.: Spaceborne detection of localized carbon dioxide sources, *Science*, 358, eaam5782, <https://doi.org/10.1126/science.aam5782>, 2017.
- 695 Staufer, J., Broquet, G., Bréon, F.-M., Puygrenier, V., Chevallier, F., Xueref-Rémy, I., Dieudonné, E., Lopez, M., Schmidt, M., Ramonet, M., Perrussel, O., Lac, C., Wu, L., and Ciais, P.: The first 1-year-long estimate of the Paris region fossil fuel CO<sub>2</sub> emissions based on atmospheric inversion, *Atmos. Chem. Phys.*, 16, 14 703–14 726, <https://doi.org/10.5194/acp-16-14703-2016>, number: 22 Reporter: *Atmos. Chem. Phys.*, 2016.
- Stuiver, M. and Polach, H. A.: Discussion Reporting of <sup>14</sup>C Data, *Radiocarbon*, 19, 355–363, <https://doi.org/10.1017/S0033822200003672>,  
700 number: 3 Reporter: *Radiocarbon*, 1977.
- Super, I., Dellaert, S. N. C., Visschedijk, A. J. H., and Denier van der Gon, H. A. C.: Uncertainty analysis of a European high-resolution emission inventory of CO<sub>2</sub> and CO to support inverse modelling and network design, *Atmospheric Chemistry and Physics*, 20, 1795–1816, <https://doi.org/https://doi.org/10.5194/acp-20-1795-2020>, publisher: Copernicus GmbH, 2020.





- 705 Tarantola, A.: Inverse Problem Theory and Methods for Model Parameter Estimation, Society for Industrial and Applied Mathematics, <https://doi.org/10.1137/1.9780898717921>, 2005.
- Turnbull, J., Rayner, P., Miller, J., Naegler, T., Ciais, P., and Cozic, A.: On the use of  $^{14}\text{CO}_2$  as a tracer for fossil fuel  $\text{CO}_2$ : Quantifying uncertainties using an atmospheric transport model, *Journal of Geophysical Research: Atmospheres*, 114, <https://doi.org/https://doi.org/10.1029/2009JD012308>, 2009.
- 710 Wang, Y.: The potential of observations of radiocarbon in atmospheric  $\text{CO}_2$  for the atmospheric inversion of fossil fuel  $\text{CO}_2$  emission at regional scale, Ph.D. thesis, Université Paris Saclay, <https://tel.archives-ouvertes.fr/tel-01529200>, 2016.
- Wang, Y., Broquet, G., Ciais, P., Chevallier, F., Vogel, F., Kadygrov, N., Wu, L., Yin, Y., Wang, R., and Tao, S.: Estimation of observation errors for large-scale atmospheric inversion of  $\text{CO}_2$  emissions from fossil fuel combustion, *Tellus B: Chemical and Physical Meteorology*, 69, 1325–1329, <https://doi.org/10.1080/16000889.2017.1325723>, number: 1 Reporter: *Tellus B: Chemical and Physical Meteorology*, 2017.
- 715 Wang, Y., Broquet, G., Ciais, P., Chevallier, F., Vogel, F., Wu, L., Yin, Y., Wang, R., and Tao, S.: Potential of European  $^{14}\text{CO}_2$  observation network to estimate the fossil fuel  $\text{CO}_2$  emissions via atmospheric inversions, *Atmos. Chem. Phys.*, 18, 4229–4250, <https://doi.org/10.5194/acp-18-4229-2018>, number: 6 Reporter: *Atmos. Chem. Phys.*, 2018.
- 720 Wang, Y., Broquet, G., Bréon, F.-M., Lespinas, F., Buchwitz, M., Reuter, M., Meijer, Y., Loescher, A., Janssens-Maenhout, G., Zheng, B., and Ciais, P.: PMIF v1.0: assessing the potential of satellite observations to constrain  $\text{CO}_2$  emissions from large cities and point sources over the globe using synthetic data, *Geoscientific Model Development*, 13, 5813–5831, <https://doi.org/https://doi.org/10.5194/gmd-13-5813-2020>, publisher: Copernicus GmbH, 2020.
- Wu, L., Broquet, G., Ciais, P., Bellassen, V., Vogel, F., Chevallier, F., Xueref-Remy, I., and Wang, Y.: What would dense atmospheric observation networks bring to the quantification of city  $\text{CO}_2$  emissions?, *Atmospheric Chemistry and Physics*, 16, 7743–7771, <https://doi.org/10.5194/acp-16-7743-2016>, number: 12 Reporter: *Atmospheric Chemistry and Physics*, 2016.
- 725 Zazzeri, G., Yeomans, E. A., and Graven, H. D.: Global and regional emissions of radiocarbon from nuclear power plants from 1972 to 2016, *Radiocarbon*, pp. 1–15, <https://doi.org/10.1017/RDC.2018.42>, reporter: *Radiocarbon*, 2018.

## Appendix A



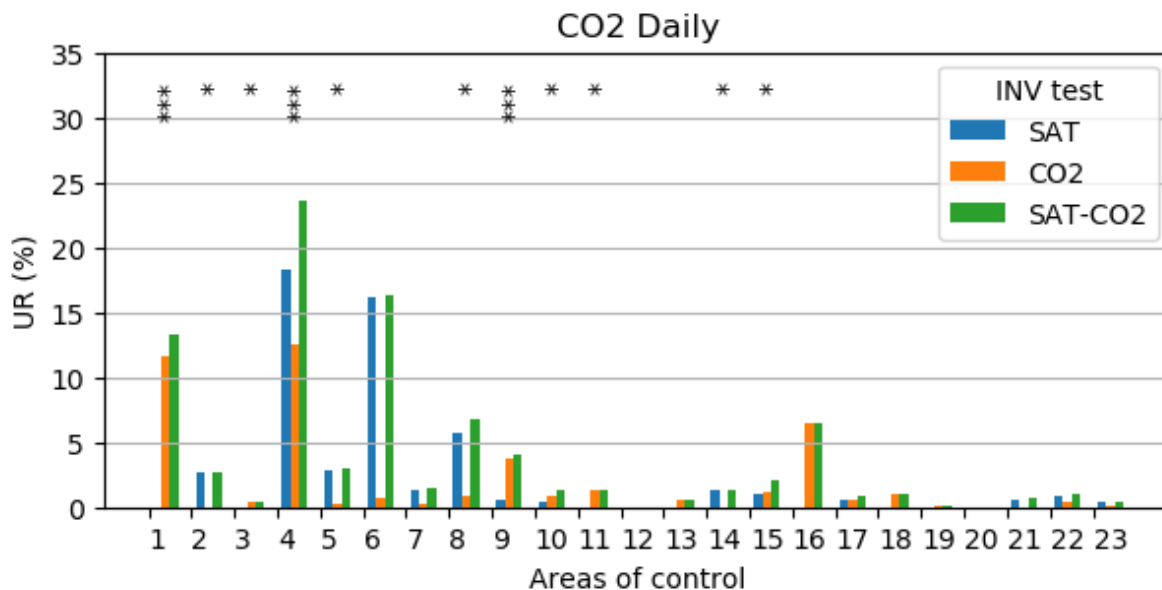

**Figure A1.** Uncertainty reduction in INV-SAT, INV-CO2 and INV-SAT-CO2 inversions for 24-h budgets of FF emissions of each controlled area in the main area of interest. The number of stars indicates the number of stations in each controlled area. The areas are listed in Table 1.

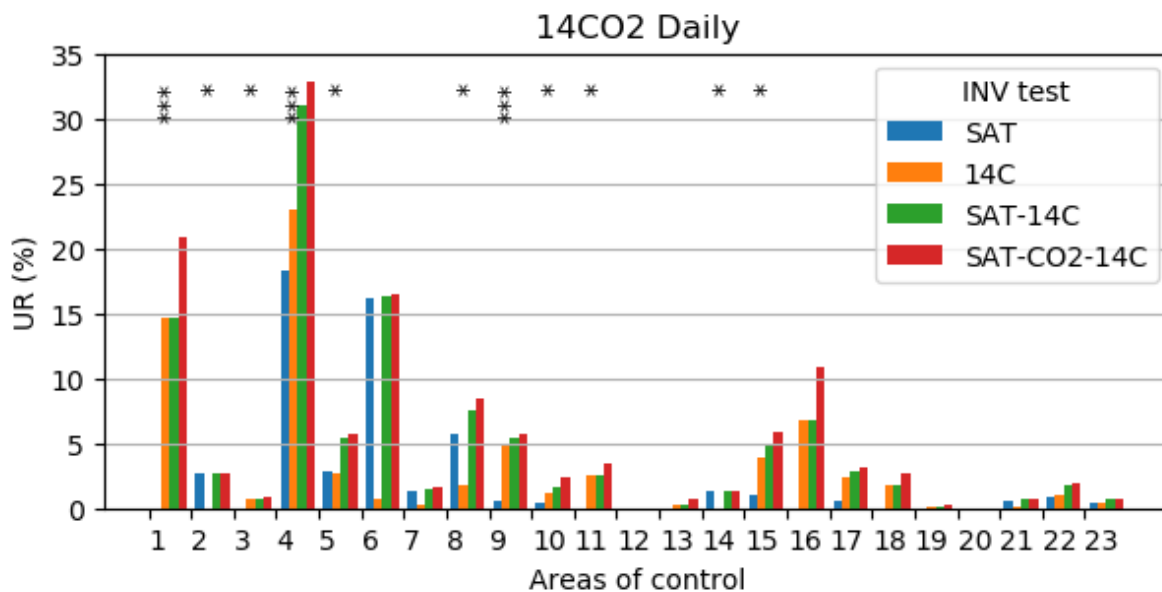

**Figure A2.** Uncertainty reduction in INV-SAT, INV-14C, INV-SAT-14C and INV-SAT-CO2-14C inversions for 24-h budgets of FF emissions of each controlled area in the main area of interest. The number of stars indicate the number of stations in each controlled area. The areas are listed in Table 1.

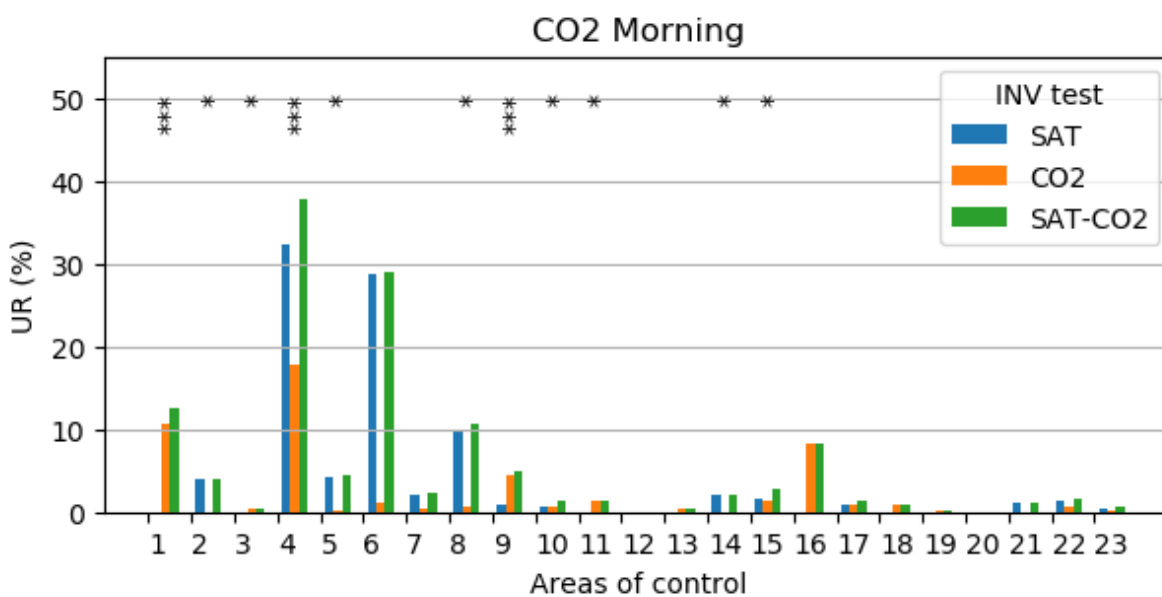

**Figure A3.** Uncertainty reduction in INV-SAT, INV-CO<sub>2</sub>, INV-SAT-CO<sub>2</sub> inversions for morning budgets of FF emissions of each controlled area in the main area of interest. The number of stars indicates the number of stations in each controlled area. The controlled areas are listed in Table 1.

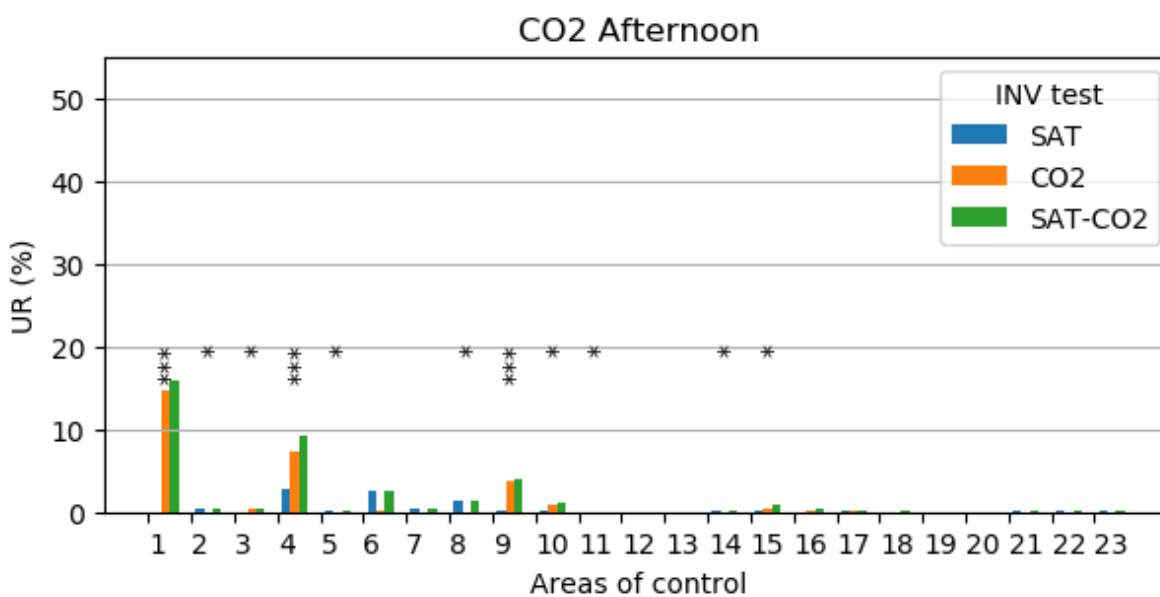

**Figure A4.** Uncertainty reduction in INV-SAT, INV-CO2, INV-SAT-CO2 inversions for afternoon budgets of FF emissions of each controlled area in the main area of interest. The number of stars indicates the number of stations in each controlled area. The names of the controlled areas are listed in Table 1.

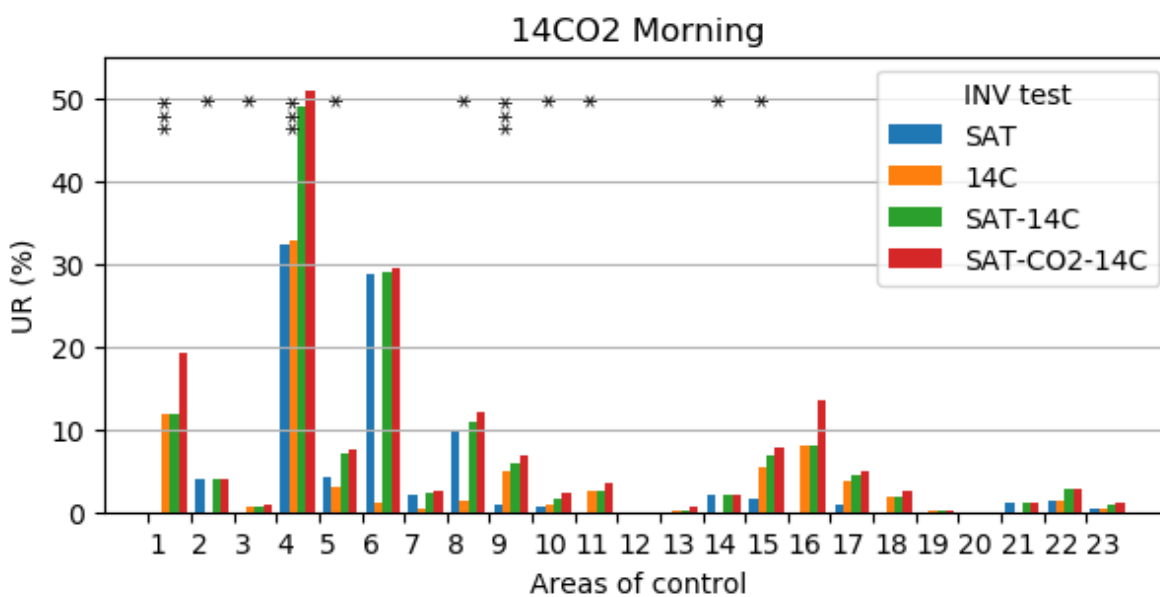

**Figure A5.** Uncertainty reduction in INV-SAT, INV-14C, INV-SAT-14C and INV-SAT-CO2-14C inversions for morning budgets of FF emissions of each controlled area in the main area of interest. The number of stars indicates the number of stations in each controlled area. The names of the controlled areas are listed in Table 1.

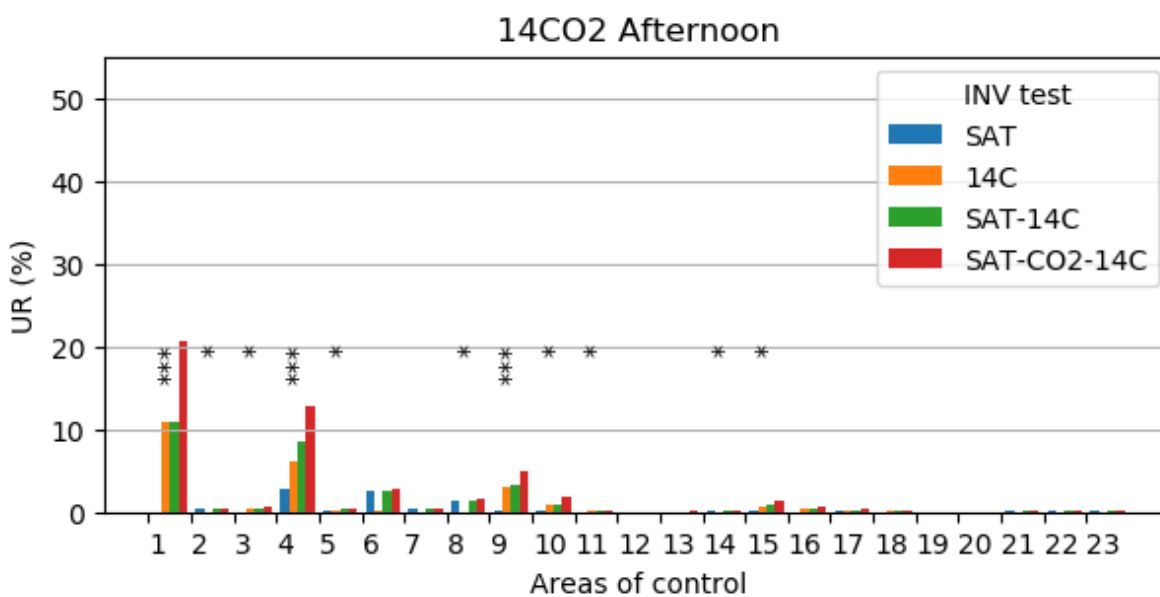

**Figure A6.** Uncertainty reduction in INV-SAT, INV-14C, INV-SAT-14C and INV-SAT-CO2-14C inversions for afternoon budgets of FF emissions of each controlled area in the main area of interest. The number of stars indicates the number of stations in each controlled area. The names of the controlled areas are listed in Table 1.

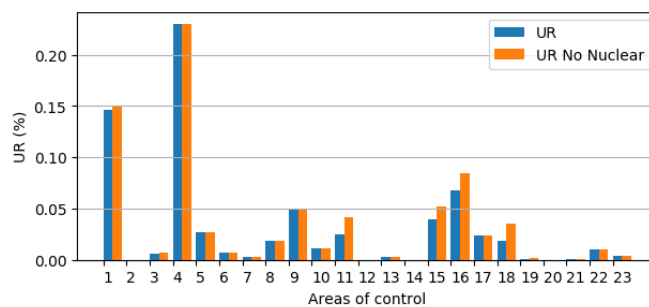

(a) UR on FF

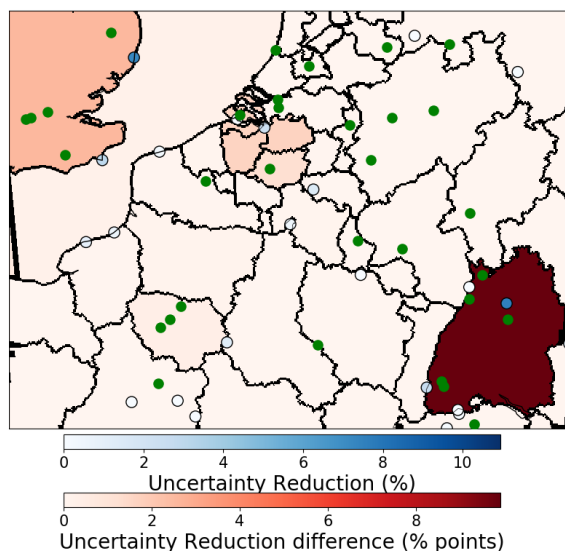

(b)  $\Delta$ UR on FF budgets and UR on  $F^{14C}$  nuclear power plant budgets

**Figure A7.** (a) Uncertainty reductions, on 24-h FF budgets, with and without nuclear emissions in INV-14C inversion, for each controlled area in the main area of interest. The names of the controlled areas are listed in Table 1. (b) Maps, on the 2-km-resolution area, of the differences between uncertainty reductions with and without nuclear emissions (red palette) in INV-14C inversions and uncertainty reductions on  $F^{14C}$  nuclear power plant budgets (dots, blue palette). Green dots indicate the ground stations.
